# Supplementary material for: Excited state dynamics and conjugation effects of the photoisomerization reactions of dihydroazulene
Source: Royal Society of Chemistry journal article supplement (doi:10.1039/d2cp02706b), 2022-01-01
Supplement: d2cp02706b1.pdf [file d2cp02706b1.pdf]

# Supporting Information: Excited State Dynamics and Conjugation Effects of the Photoisomerization Reactions of Dihydroazulene

Andreas Erbs Hillers-Bendtsen,<sup>a</sup> Frederik Ørsted Kjeldal,<sup>a</sup> Nicolai Ree,<sup>a</sup>,  
Eduard Matito,<sup>b,c</sup> and Kurt V. Mikkelsen<sup>a</sup>

<sup>a</sup> *Department of Chemistry, University of Copenhagen, Universitetsparken 5, 2100 Copenhagen Ø,  
Denmark.*

<sup>b</sup> *Donostia International Physics Center (DIPC), 20018 Donostia, Euskadi, Spain*

<sup>c</sup> *IKERBASQUE, Basque Foundation for Science, 48103 Bilbao, Euskadi, Spain*

E-mail: kmi@chem.ku.dk

# 1 Structures and energies

In this section, we have included the used structures of the different dihydroazulene (DHA), transition states (TS), and vinylheptatriene (VHF) systems given in Cartesian coordinates with units in Å. Along with the structures, we have given the electronic energy including the zero-point vibrational energy in atomic units of the given structure. The structures and associated energies are calculated in the first electronically excited singlet state using time-dependent density functional theory employing the M06-2X/6-311+G\* methodology as implemented in Gaussian 16.

32

Parent-DHA vacuum Energy: -802.105562

|   |          |          |          |
|---|----------|----------|----------|
| C | 4.58406  | -0.45003 | 0.18539  |
| C | 3.97816  | -1.72589 | 0.13415  |
| C | 2.64108  | -2.05693 | -0.01661 |
| C | 1.55280  | -1.17941 | -0.18763 |
| C | 1.60515  | 0.24388  | -0.64003 |
| C | 2.74490  | 1.14411  | -0.44390 |
| C | 4.02642  | 0.81233  | -0.05339 |
| C | 0.19708  | -1.53410 | -0.01612 |
| C | -0.65819 | -0.45753 | -0.04929 |
| C | 0.20219  | 0.80284  | -0.10433 |
| C | -0.29629 | 1.85969  | -0.99306 |
| N | -0.63567 | 2.67470  | -1.72708 |
| H | 5.64336  | -0.45278 | 0.42105  |
| H | 4.65111  | -2.56146 | 0.29946  |
| H | 2.38474  | -3.10826 | 0.08508  |
| H | 1.43961  | 0.20448  | -1.73699 |
| H | 2.55414  | 2.17976  | -0.71676 |
| H | -0.12319 | -2.55293 | 0.16884  |
| C | -2.10251 | -0.44690 | -0.00181 |
| C | -2.81842 | 0.70139  | 0.38277  |
| C | -2.82990 | -1.61061 | -0.31914 |
| C | -4.20344 | 0.68180  | 0.44948  |
| H | -2.29206 | 1.60908  | 0.65814  |
| C | -4.21211 | -1.62499 | -0.24334 |
| H | -2.30183 | -2.49714 | -0.65268 |
| C | -4.90746 | -0.47856 | 0.13980  |
| H | -4.73552 | 1.57612  | 0.75251  |
| H | -4.75402 | -2.52908 | -0.49697 |
| H | -5.98991 | -0.49001 | 0.19309  |
| H | 4.71710  | 1.64669  | 0.02447  |
| C | 0.39427  | 1.33616  | 1.25371  |
| N | 0.55278  | 1.73559  | 2.31862  |

Parent-DHA acetonitrile Energy: -802.105005

|   |          |          |          |
|---|----------|----------|----------|
| C | -4.60356 | 0.47023  | 0.16944  |
| C | -3.98697 | 1.74062  | 0.07998  |
| C | -2.64965 | 2.05528  | -0.05735 |
| C | -1.55821 | 1.16227  | -0.18956 |
| C | -1.61942 | -0.27883 | -0.60477 |
| C | -2.75769 | -1.17059 | -0.30350 |
| C | -4.04138 | -0.80977 | 0.02835  |
| C | -0.21644 | 1.52668  | -0.03828 |
| C | 0.65546  | 0.44933  | -0.07519 |
| C | -0.20212 | -0.81829 | -0.11890 |
| C | 0.28861  | -1.86134 | -1.02927 |
| N | 0.63575  | -2.66158 | -1.77544 |
| H | -5.66995 | 0.48858  | 0.37046  |
| H | -4.65774 | 2.58589  | 0.19552  |
| H | -2.38556 | 3.10738  | 0.00389  |
| H | -1.52389 | -0.26905 | -1.70788 |
| H | -2.56310 | -2.22867 | -0.46387 |
| H | 0.09635  | 2.54996  | 0.13192  |
| C | 2.08957  | 0.44945  | -0.01382 |
| C | 2.82511  | -0.71396 | 0.30354  |
| C | 2.80990  | 1.64380  | -0.24922 |
| C | 4.20894  | -0.68065 | 0.37963  |
| H | 2.31599  | -1.64665 | 0.52098  |
| C | 4.19093  | 1.66770  | -0.16629 |
| H | 2.27675  | 2.54768  | -0.52076 |
| C | 4.90162  | 0.50665  | 0.14609  |
| H | 4.75084  | -1.58496 | 0.63163  |
| H | 4.72173  | 2.59367  | -0.35597 |
| H | 5.98340  | 0.52823  | 0.20624  |
| H | -4.73614 | -1.63494 | 0.15350  |
| C | -0.33040 | -1.36275 | 1.24404  |
| N | -0.44068 | -1.75157 | 2.31899  |

32

Parent-DHA cyclohexane Energy: -802.113210

|   |          |          |          |
|---|----------|----------|----------|
| C | 4.59257  | -0.45905 | 0.17676  |
| C | 3.98180  | -1.73264 | 0.11455  |
| C | 2.64407  | -2.05685 | -0.02914 |
| C | 1.55493  | -1.17340 | -0.18604 |
| C | 1.61011  | 0.25660  | -0.62512 |
| C | 2.75024  | 1.15479  | -0.39111 |
| C | 4.03322  | 0.81078  | -0.02570 |
| C | 0.20403  | -1.53150 | -0.02203 |
| C | -0.65743 | -0.45510 | -0.05725 |
| C | 0.20207  | 0.80799  | -0.10902 |
| C | -0.29334 | 1.85865  | -1.00746 |
| N | -0.63426 | 2.66793  | -1.74694 |
| H | 5.65512  | -0.46819 | 0.39735  |
| H | 4.65343  | -2.57239 | 0.26256  |
| H | 2.38462  | -3.10834 | 0.06002  |
| H | 1.47154  | 0.22703  | -1.72517 |
| H | 2.55745  | 2.20065  | -0.61989 |
| H | -0.11370 | -2.55169 | 0.15883  |
| C | -2.09814 | -0.44842 | -0.00552 |
| C | -2.82115 | 0.70628  | 0.35290  |
| C | -2.82304 | -1.62401 | -0.29267 |
| C | -4.20576 | 0.68205  | 0.42208  |
| H | -2.30114 | 1.62365  | 0.60724  |
| C | -4.20486 | -1.64159 | -0.21515 |
| H | -2.29326 | -2.51777 | -0.60290 |
| C | -4.90573 | -0.48882 | 0.14081  |
| H | -4.74123 | 1.58083  | 0.70534  |
| H | -4.74292 | -2.55420 | -0.44533 |
| H | -5.98800 | -0.50374 | 0.19573  |
| H | 4.72592  | 1.64180  | 0.06791  |
| C | 0.36962  | 1.34869  | 1.25009  |
| N | 0.51039  | 1.74859  | 2.31729  |

32

Parent-DHA ethanol Energy: -802.125622

|   |          |          |          |
|---|----------|----------|----------|
| C | -4.60357 | 0.46986  | 0.16918  |
| C | -3.98720 | 1.74032  | 0.08038  |
| C | -2.64975 | 2.05528  | -0.05643 |
| C | -1.55837 | 1.16262  | -0.18883 |
| C | -1.61931 | -0.27822 | -0.60461 |
| C | -2.75745 | -1.17031 | -0.30482 |
| C | -4.04131 | -0.80989 | 0.02719  |
| C | -0.21627 | 1.52690  | -0.03704 |
| C | 0.65538  | 0.44977  | -0.07413 |
| C | -0.20202 | -0.81785 | -0.11858 |
| C | 0.28890  | -1.86034 | -1.02950 |
| N | 0.63580  | -2.66016 | -1.77624 |
| H | -5.66993 | 0.48799  | 0.37038  |
| H | -4.65811 | 2.58544  | 0.19628  |
| H | -2.38588 | 3.10739  | 0.00566  |
| H | -1.52322 | -0.26770 | -1.70773 |
| H | -2.56252 | -2.22820 | -0.46602 |
| H | 0.09654  | 2.55010  | 0.13367  |
| C | 2.08973  | 0.44969  | -0.01324 |
| C | 2.82487  | -0.71371 | 0.30434  |
| C | 2.81020  | 1.64361  | -0.24954 |
| C | 4.20873  | -0.68080 | 0.37997  |
| H | 2.31540  | -1.64610 | 0.52227  |
| C | 4.19125  | 1.66722  | -0.16704 |
| H | 2.27712  | 2.54739  | -0.52157 |
| C | 4.90164  | 0.50615  | 0.14573  |
| H | 4.75041  | -1.58518 | 0.63212  |
| H | 4.72229  | 2.59291  | -0.35744 |
| H | 5.98344  | 0.52743  | 0.20552  |
| H | -4.73595 | -1.63524 | 0.15179  |
| C | -0.33072 | -1.36344 | 1.24384  |
| N | -0.44122 | -1.75377 | 2.31822  |

32

Parent-DHA toluene Energy: -802.114617

|   |          |          |          |
|---|----------|----------|----------|
| C | 4.59358  | -0.46040 | 0.17630  |
| C | 3.98217  | -1.73366 | 0.11106  |
| C | 2.64449  | -2.05674 | -0.03214 |
| C | 1.55516  | -1.17223 | -0.18679 |
| C | 1.61099  | 0.25901  | -0.62344 |
| C | 2.75116  | 1.15662  | -0.38233 |
| C | 4.03402  | 0.81067  | -0.02007 |
| C | 0.20525  | -1.53099 | -0.02419 |
| C | -0.65733 | -0.45448 | -0.05960 |
| C | 0.20209  | 0.80903  | -0.11014 |
| C | -0.29281 | 1.85937  | -1.00929 |
| N | -0.63416 | 2.66817  | -1.74907 |
| H | 5.65648  | -0.47057 | 0.39519  |
| H | 4.65362  | -2.57408 | 0.25592  |
| H | 2.38452  | -3.10830 | 0.05420  |
| H | 1.47675  | 0.23154  | -1.72385 |
| H | 2.55833  | 2.20402  | -0.60388 |
| H | -0.11196 | -2.55146 | 0.15574  |
| C | -2.09732 | -0.44843 | -0.00679 |
| C | -2.82153 | 0.70719  | 0.34774  |
| C | -2.82185 | -1.62607 | -0.28847 |
| C | -4.20605 | 0.68206  | 0.41796  |
| H | -2.30270 | 1.62623  | 0.59838  |
| C | -4.20358 | -1.64427 | -0.21015 |
| H | -2.29186 | -2.52096 | -0.59491 |
| C | -4.90536 | -0.49058 | 0.14166  |
| H | -4.74207 | 1.58143  | 0.69830  |
| H | -4.74098 | -2.55830 | -0.43613 |
| H | -5.98757 | -0.50623 | 0.19734  |
| H | 4.72697  | 1.64109  | 0.07694  |
| C | 0.36573  | 1.34959  | 1.24962  |
| N | 0.50382  | 1.74774  | 2.31783  |

32

Parent-TS vacuum Energy: -802.102203

|   |          |          |          |
|---|----------|----------|----------|
| C | 4.47805  | -0.40718 | 0.18917  |
| C | 3.88829  | -1.69074 | 0.23480  |
| C | 2.56926  | -2.05238 | 0.03519  |
| C | 1.48142  | -1.20127 | -0.24827 |
| C | 1.57566  | 0.13433  | -0.90663 |
| C | 2.71911  | 0.97315  | -0.94302 |
| C | 3.95114  | 0.77449  | -0.31872 |
| C | 0.14547  | -1.50400 | 0.06707  |
| C | -0.69042 | -0.39671 | 0.06347  |
| C | 0.14058  | 0.83317  | 0.03051  |
| C | -0.36062 | 1.98434  | -0.69589 |
| N | -0.69982 | 2.88102  | -1.33074 |
| H | 5.50386  | -0.35609 | 0.53947  |
| H | 4.54970  | -2.49322 | 0.54675  |
| H | 2.31104  | -3.08698 | 0.24941  |
| H | 1.03584  | 0.12711  | -1.85938 |
| H | 2.60556  | 1.88145  | -1.52953 |
| H | -0.18170 | -2.50203 | 0.33594  |
| C | -2.14203 | -0.39821 | 0.04827  |
| C | -2.87956 | 0.69407  | 0.53461  |
| C | -2.84091 | -1.52136 | -0.42825 |
| C | -4.26614 | 0.66303  | 0.53886  |
| H | -2.36433 | 1.56066  | 0.93502  |
| C | -4.22617 | -1.55139 | -0.41140 |
| H | -2.28704 | -2.35914 | -0.83801 |
| C | -4.94481 | -0.45820 | 0.06906  |
| H | -4.81953 | 1.51358  | 0.91963  |
| H | -4.75011 | -2.42280 | -0.78739 |
| H | -6.02849 | -0.48024 | 0.07567  |
| H | 4.63155  | 1.62072  | -0.34113 |
| C | 0.74155  | 1.19821  | 1.30243  |
| N | 1.23619  | 1.48425  | 2.30018  |

32

Parent-TS acetonitrile Energy: -802.119639

|   |          |          |          |
|---|----------|----------|----------|
| C | -4.48241 | -0.42897 | 0.19704  |
| C | -3.88142 | -1.71175 | 0.22547  |
| C | -2.56367 | -2.05861 | 0.01583  |
| C | -3.96781 | 0.76028  | -0.30678 |
| C | -1.47940 | -1.18696 | -0.24833 |
| C | -2.74011 | 0.97522  | -0.93560 |
| C | -1.58870 | 0.14588  | -0.91179 |
| H | -5.50841 | -0.39041 | 0.54829  |
| H | -4.53701 | -2.52413 | 0.52271  |
| H | -2.29580 | -3.09594 | 0.20089  |
| H | -4.65957 | 1.59737  | -0.32910 |
| H | -2.64321 | 1.88574  | -1.52113 |
| C | -0.15231 | -1.48810 | 0.07699  |
| C | 0.69361  | -0.38179 | 0.06940  |
| C | -0.12638 | 0.85482  | 0.03463  |
| C | 0.37877  | 2.00106  | -0.69153 |
| C | -0.73715 | 1.22162  | 1.29774  |
| N | 0.72540  | 2.89638  | -1.32492 |
| N | -1.25077 | 1.50248  | 2.28813  |
| H | -1.04763 | 0.14775  | -1.86254 |
| H | 0.16962  | -2.48661 | 0.34940  |
| C | 2.14121  | -0.39667 | 0.05420  |
| C | 2.89388  | 0.69843  | 0.51843  |
| C | 2.82830  | -1.53781 | -0.40427 |
| C | 4.28044  | 0.65401  | 0.51616  |
| H | 2.39200  | 1.57541  | 0.91317  |
| C | 4.21359  | -1.57894 | -0.39531 |
| H | 2.26674  | -2.38110 | -0.79078 |
| C | 4.94622  | -0.48271 | 0.06067  |
| H | 4.84447  | 1.50375  | 0.88279  |
| H | 4.72683  | -2.46270 | -0.75634 |
| H | 6.02954  | -0.51534 | 0.06238  |

32

Parent-TS cyclohexane Energy: -802.108864

|   |          |          |          |
|---|----------|----------|----------|
| C | -4.48072 | -0.41650 | 0.18773  |
| C | -3.88626 | -1.69924 | 0.22967  |
| C | -2.56687 | -2.05482 | 0.03028  |
| C | -3.95769 | 0.76798  | -0.31794 |
| C | -1.48029 | -1.19600 | -0.24505 |
| C | -2.72642 | 0.97238  | -0.94210 |
| C | -1.57983 | 0.13755  | -0.90791 |
| H | -5.50720 | -0.37017 | 0.53665  |
| H | -4.54559 | -2.50540 | 0.53609  |
| H | -2.30523 | -3.08995 | 0.23678  |
| H | -4.64231 | 1.61078  | -0.34165 |
| H | -2.61851 | 1.88113  | -1.52880 |
| C | -0.14799 | -1.49714 | 0.07630  |
| C | 0.69188  | -0.39018 | 0.06932  |
| C | -0.13494 | 0.84181  | 0.03402  |
| C | 0.36775  | 1.99066  | -0.69310 |
| C | -0.74109 | 1.20942  | 1.30154  |
| N | 0.70900  | 2.88633  | -1.32850 |
| N | -1.24284 | 1.49644  | 2.29570  |
| H | -1.03829 | 0.13262  | -1.85920 |
| H | 0.17747  | -2.49453 | 0.34924  |
| C | 2.14198  | -0.39742 | 0.05190  |
| C | 2.88662  | 0.69580  | 0.52795  |
| C | 2.83507  | -1.52801 | -0.41848 |
| C | 4.27317  | 0.65906  | 0.52740  |
| H | 2.37771  | 1.56691  | 0.92663  |
| C | 4.22033  | -1.56298 | -0.40687 |
| H | 2.27715  | -2.36779 | -0.81840 |
| C | 4.94559  | -0.46867 | 0.06259  |
| H | 4.83154  | 1.50942  | 0.90117  |
| H | 4.73928  | -2.43947 | -0.77777 |
| H | 6.02915  | -0.49517 | 0.06543  |

32

Parent-TS ethanol Energy: -802.119209

|   |          |          |          |
|---|----------|----------|----------|
| C | -4.48258 | -0.42874 | 0.19615  |
| C | -3.88174 | -1.71146 | 0.22504  |
| C | -2.56381 | -2.05849 | 0.01621  |
| C | -3.96760 | 0.76049  | -0.30728 |
| C | -1.47946 | -1.18720 | -0.24800 |
| C | -2.73965 | 0.97520  | -0.93565 |
| C | -1.58838 | 0.14570  | -0.91138 |
| H | -5.50869 | -0.39003 | 0.54709  |
| H | -4.53747 | -2.52372 | 0.52236  |
| H | -2.29614 | -3.09572 | 0.20217  |
| H | -4.65911 | 1.59778  | -0.32960 |
| H | -2.64229 | 1.88572  | -1.52110 |
| C | -0.15222 | -1.48831 | 0.07735  |
| C | 0.69353  | -0.38200 | 0.06973  |
| C | -0.12669 | 0.85444  | 0.03485  |
| C | 0.37839  | 2.00071  | -0.69145 |
| C | -0.73704 | 1.22148  | 1.29820  |
| N | 0.72479  | 2.89596  | -1.32504 |
| N | -1.24985 | 1.50282  | 2.28885  |
| H | -1.04730 | 0.14733  | -1.86215 |
| H | 0.16987  | -2.48677 | 0.34980  |
| C | 2.14121  | -0.39671 | 0.05422  |
| C | 2.89377  | 0.69832  | 0.51858  |
| C | 2.82835  | -1.53759 | -0.40466 |
| C | 4.28032  | 0.65406  | 0.51612  |
| H | 2.39180  | 1.57519  | 0.91343  |
| C | 4.21363  | -1.57862 | -0.39583 |
| H | 2.26677  | -2.38077 | -0.79144 |
| C | 4.94617  | -0.48245 | 0.06035  |
| H | 4.84429  | 1.50385  | 0.88277  |
| H | 4.72695  | -2.46221 | -0.75719 |
| H | 6.02949  | -0.51495 | 0.06191  |

32

Parent-TS toluene Energy: -802.110175

|   |          |          |          |
|---|----------|----------|----------|
| C | -4.48120 | -0.41823 | 0.18780  |
| C | -3.88583 | -1.70085 | 0.22874  |
| C | -2.56643 | -2.05526 | 0.02904  |
| C | -3.95899 | 0.76685  | -0.31739 |
| C | -1.48012 | -1.19492 | -0.24478 |
| C | -2.72791 | 0.97249  | -0.94160 |
| C | -1.58072 | 0.13838  | -0.90814 |
| H | -5.50778 | -0.37288 | 0.53653  |
| H | -4.54473 | -2.50776 | 0.53404  |
| H | -2.30408 | -3.09055 | 0.23368  |
| H | -4.64447 | 1.60895  | -0.34123 |
| H | -2.62113 | 1.88142  | -1.52819 |
| C | -0.14849 | -1.49589 | 0.07743  |
| C | 0.69213  | -0.38900 | 0.07003  |
| C | -0.13389 | 0.84345  | 0.03452  |
| C | 0.36905  | 1.99193  | -0.69263 |
| C | -0.74075 | 1.21129  | 1.30139  |
| N | 0.71079  | 2.88749  | -1.32797 |
| N | -1.24375 | 1.49809  | 2.29503  |
| H | -1.03903 | 0.13405  | -1.85924 |
| H | 0.17660  | -2.49326 | 0.35081  |
| C | 2.14193  | -0.39729 | 0.05241  |
| C | 2.88782  | 0.69619  | 0.52650  |
| C | 2.83402  | -1.52933 | -0.41656 |
| C | 4.27437  | 0.65838  | 0.52527  |
| H | 2.38001  | 1.56817  | 0.92468  |
| C | 4.21928  | -1.56520 | -0.40572 |
| H | 2.27542  | -2.36955 | -0.81454 |
| C | 4.94570  | -0.47062 | 0.06163  |
| H | 4.83362  | 1.50873  | 0.89774  |
| H | 4.73734  | -2.44270 | -0.77544 |
| H | 6.02923  | -0.49796 | 0.06395  |

32

Parent-VHF vacuum Energy: -802.123697

|   |          |          |          |
|---|----------|----------|----------|
| C | 4.55280  | -0.63654 | 0.30292  |
| C | 3.82407  | -1.80025 | 0.45080  |
| C | 2.42049  | -1.95021 | 0.25614  |
| C | 1.54784  | -1.09876 | -0.35031 |
| C | 1.91530  | 0.06096  | -1.17633 |
| C | 3.04904  | 0.81659  | -1.07504 |
| C | 4.18715  | 0.58550  | -0.27880 |
| C | 0.11091  | -1.28991 | -0.15852 |
| C | -0.73014 | -0.23497 | -0.01761 |
| C | -0.14625 | 1.11193  | 0.15683  |
| C | -0.61027 | 2.21202  | -0.59579 |
| N | -0.97924 | 3.09274  | -1.24709 |
| H | 5.56958  | -0.67508 | 0.68682  |
| H | 4.33515  | -2.64160 | 0.90421  |
| H | 1.97997  | -2.82932 | 0.72451  |
| H | 1.20522  | 0.32527  | -1.95234 |
| H | 3.07518  | 1.71418  | -1.68938 |
| H | -0.28389 | -2.29996 | -0.09801 |
| C | -2.20049 | -0.37784 | 0.02984  |
| C | -2.98341 | 0.51396  | 0.77191  |
| C | -2.83817 | -1.41318 | -0.66525 |
| C | -4.36271 | 0.36180  | 0.83333  |
| H | -2.51005 | 1.32396  | 1.31629  |
| C | -4.21565 | -1.56802 | -0.59587 |
| H | -2.25295 | -2.08112 | -1.28781 |
| C | -4.98332 | -0.68113 | 0.15407  |
| H | -4.95299 | 1.06014  | 1.41535  |
| H | -4.69392 | -2.37180 | -1.14409 |
| H | -6.06011 | -0.79682 | 0.19945  |
| H | 4.92751  | 1.37602  | -0.24769 |
| C | 0.76444  | 1.35149  | 1.20388  |
| N | 1.52945  | 1.49520  | 2.06072  |

Parent-VHF acetonitrile      Energy: -802.137734

|   |          |          |          |
|---|----------|----------|----------|
| C | -4.55438 | -0.58632 | 0.24488  |
| C | -3.84735 | -1.77817 | 0.41818  |
| C | -2.47033 | -1.98131 | 0.24292  |
| C | -4.15171 | 0.60849  | -0.35267 |
| C | -1.52820 | -1.10930 | -0.28156 |
| C | -2.97702 | 0.82329  | -1.09990 |
| C | -1.83238 | 0.06676  | -1.11596 |
| H | -5.57708 | -0.59837 | 0.61152  |
| H | -4.39789 | -2.60326 | 0.85511  |
| H | -2.07575 | -2.90933 | 0.65248  |
| H | -4.89082 | 1.40143  | -0.38203 |
| H | -2.97779 | 1.69730  | -1.74657 |
| C | -0.13729 | -1.32466 | -0.01478 |
| C | 0.72127  | -0.24971 | 0.04357  |
| C | 0.11324  | 1.07866  | 0.13994  |
| C | 0.64430  | 2.18163  | -0.57873 |
| C | -0.81635 | 1.37431  | 1.16848  |
| N | 1.07039  | 3.06004  | -1.19416 |
| N | -1.58668 | 1.58251  | 2.00433  |
| H | -1.11995 | 0.26571  | -1.91021 |
| H | 0.23101  | -2.32831 | 0.17646  |
| C | 2.18491  | -0.38366 | 0.05387  |
| C | 2.99110  | 0.54189  | 0.73340  |
| C | 2.80222  | -1.45568 | -0.60859 |
| C | 4.37225  | 0.39310  | 0.75661  |
| H | 2.53454  | 1.36782  | 1.26889  |
| C | 4.18229  | -1.60459 | -0.57720 |
| H | 2.19716  | -2.15921 | -1.16991 |
| C | 4.97282  | -0.68038 | 0.10355  |
| H | 4.97987  | 1.11308  | 1.29265  |
| H | 4.64396  | -2.43609 | -1.09727 |
| H | 6.05048  | -0.79479 | 0.12163  |

32

Parent-VHF cyclohexane Energy: -802.130068

|   |          |          |          |
|---|----------|----------|----------|
| C | -4.55792 | -0.61234 | 0.28210  |
| C | -3.83202 | -1.77364 | 0.47966  |
| C | -2.43512 | -1.94457 | 0.29155  |
| C | -4.18238 | 0.58589  | -0.34245 |
| C | -1.54313 | -1.10606 | -0.31927 |
| C | -3.02842 | 0.79885  | -1.11703 |
| C | -1.88397 | 0.04689  | -1.16640 |
| H | -5.57841 | -0.63445 | 0.65607  |
| H | -4.35167 | -2.59614 | 0.95720  |
| H | -2.00737 | -2.82521 | 0.76804  |
| H | -4.92784 | 1.37232  | -0.35948 |
| H | -3.04377 | 1.67775  | -1.75765 |
| C | -0.11835 | -1.30657 | -0.10490 |
| C | 0.72496  | -0.24267 | 0.00399  |
| C | 0.13297  | 1.09804  | 0.14399  |
| C | 0.65373  | 2.20283  | -0.57067 |
| C | -0.80759 | 1.36373  | 1.16349  |
| N | 1.07207  | 3.08768  | -1.18381 |
| N | -1.58959 | 1.54233  | 1.99669  |
| H | -1.16794 | 0.27939  | -1.94737 |
| H | 0.27211  | -2.31475 | -0.00059 |
| C | 2.19394  | -0.38071 | 0.03792  |
| C | 2.98072  | 0.49481  | 0.79665  |
| C | 2.82631  | -1.40202 | -0.68307 |
| C | 4.36031  | 0.34107  | 0.84654  |
| H | 2.50987  | 1.28925  | 1.36619  |
| C | 4.20496  | -1.55651 | -0.62717 |
| H | 2.23485  | -2.05885 | -1.31167 |
| C | 4.97675  | -0.68580 | 0.13790  |
| H | 4.95442  | 1.02374  | 1.44303  |
| H | 4.68018  | -2.34802 | -1.19543 |
| H | 6.05377  | -0.80233 | 0.17456  |

Parent-VHF ethanol Energy: -802.137302

|   |          |          |          |
|---|----------|----------|----------|
| C | -4.55421 | -0.58733 | 0.24557  |
| C | -3.84714 | -1.77901 | 0.41741  |
| C | -2.46979 | -1.98169 | 0.24157  |
| C | -4.15186 | 0.60852  | -0.35050 |
| C | -1.52834 | -1.10961 | -0.28286 |
| C | -2.97743 | 0.82448  | -1.09748 |
| C | -1.83281 | 0.06779  | -1.11550 |
| H | -5.57688 | -0.59999 | 0.61233  |
| H | -4.39732 | -2.60453 | 0.85401  |
| H | -2.07483 | -2.90964 | 0.65096  |
| H | -4.89097 | 1.40149  | -0.37830 |
| H | -2.97811 | 1.69985  | -1.74233 |
| C | -0.13689 | -1.32501 | -0.01701 |
| C | 0.72129  | -0.25030 | 0.04210  |
| C | 0.11276  | 1.07810  | 0.13934  |
| C | 0.64154  | 2.18107  | -0.58105 |
| C | -0.81419 | 1.37371  | 1.17030  |
| N | 1.06528  | 3.05952  | -1.19800 |
| N | -1.58216 | 1.58191  | 2.00827  |
| H | -1.12110 | 0.26750  | -1.91024 |
| H | 0.23179  | -2.32884 | 0.17254  |
| C | 2.18507  | -0.38368 | 0.05333  |
| C | 2.99045  | 0.54213  | 0.73330  |
| C | 2.80326  | -1.45530 | -0.60886 |
| C | 4.37163  | 0.39391  | 0.75739  |
| H | 2.53332  | 1.36807  | 1.26829  |
| C | 4.18334  | -1.60370 | -0.57659 |
| H | 2.19891  | -2.15895 | -1.17081 |
| C | 4.97306  | -0.67927 | 0.10473  |
| H | 4.97857  | 1.11427  | 1.29366  |
| H | 4.64566  | -2.43491 | -1.09656 |
| H | 6.05076  | -0.79318 | 0.12338  |

Parent-VHF toluene Energy: -802.130589

|   |          |          |          |
|---|----------|----------|----------|
| C | -4.55703 | -0.61226 | 0.27881  |
| C | -3.83374 | -1.78019 | 0.46292  |
| C | -2.44066 | -1.95503 | 0.27398  |
| C | -4.17825 | 0.58992  | -0.33259 |
| C | -1.54081 | -1.10586 | -0.31700 |
| C | -3.02157 | 0.80941  | -1.10225 |
| C | -1.87691 | 0.05737  | -1.15310 |
| H | -5.57717 | -0.63559 | 0.65335  |
| H | -4.35774 | -2.60625 | 0.92949  |
| H | -2.01774 | -2.84741 | 0.73257  |
| H | -4.92283 | 1.37741  | -0.34477 |
| H | -3.03584 | 1.69181  | -1.73797 |
| C | -0.12163 | -1.30977 | -0.09623 |
| C | 0.72437  | -0.24463 | 0.00505  |
| C | 0.12875  | 1.09439  | 0.13980  |
| C | 0.64395  | 2.19809  | -0.58193 |
| C | -0.79972 | 1.36546  | 1.17023  |
| N | 1.05696  | 3.08097  | -1.20117 |
| N | -1.57133 | 1.54889  | 2.01166  |
| H | -1.16450 | 0.28772  | -1.93821 |
| H | 0.26480  | -2.31798 | 0.02189  |
| C | 2.19245  | -0.38110 | 0.03832  |
| C | 2.98077  | 0.50552  | 0.78308  |
| C | 2.82416  | -1.41279 | -0.66907 |
| C | 4.36059  | 0.35320  | 0.83208  |
| H | 2.51114  | 1.30727  | 1.34333  |
| C | 4.20293  | -1.56582 | -0.61362 |
| H | 2.23197  | -2.07931 | -1.28665 |
| C | 4.97609  | -0.68362 | 0.13707  |
| H | 4.95552  | 1.04449  | 1.41773  |
| H | 4.67727  | -2.36557 | -1.17094 |
| H | 6.05321  | -0.79931 | 0.17335  |

34

34-DHA vacuum Energy: -878.318632

|   |          |          |          |
|---|----------|----------|----------|
| C | 4.65420  | 0.60686  | 0.14929  |
| C | 3.91698  | 1.80357  | -0.02602 |
| C | 2.54917  | 1.98591  | -0.15557 |
| C | 4.21800  | -0.72138 | 0.12337  |
| C | 1.54903  | 0.99756  | -0.20513 |
| C | 2.95629  | -1.22233 | -0.13745 |
| C | 1.75580  | -0.45051 | -0.48758 |
| H | 5.71578  | 0.74468  | 0.32782  |
| H | 4.50817  | 2.71353  | 0.00366  |
| H | 2.20444  | 3.01564  | -0.17526 |
| H | 2.84290  | -2.30153 | -0.20878 |
| C | -0.58927 | 0.05397  | -0.10362 |
| C | 0.38219  | -1.11996 | -0.07170 |
| H | 1.74374  | -0.49515 | -1.60356 |
| C | 0.05609  | -2.21604 | -0.99533 |
| C | 0.47912  | -1.64348 | 1.30206  |
| N | -0.15914 | -3.05737 | -1.74622 |
| N | 0.55792  | -2.03137 | 2.37964  |
| H | 4.98575  | -1.46883 | 0.29972  |
| C | -1.99270 | 0.01819  | -0.03528 |
| C | -2.66912 | 1.27774  | -0.01222 |
| C | -2.76198 | -1.17521 | 0.04210  |
| C | -4.12909 | -1.11452 | 0.11275  |
| H | -2.26781 | -2.14005 | 0.04877  |
| C | -4.79835 | 0.12944  | 0.11534  |
| H | -4.70384 | -2.03189 | 0.16981  |
| H | -5.88036 | 0.15749  | 0.17017  |
| C | 0.14337  | 1.24026  | -0.12957 |
| C | -0.54802 | 2.48622  | -0.08168 |
| C | -1.91021 | 2.48646  | -0.03526 |
| H | -2.45057 | 3.42749  | -0.00740 |
| H | 0.00117  | 3.42025  | -0.09034 |
| C | -4.07876 | 1.29774  | 0.05807  |
| H | -4.58725 | 2.25659  | 0.07201  |

34

34-DHA acetonitrile Energy: -878.337341

|   |          |          |          |
|---|----------|----------|----------|
| C | 4.65251  | 0.60225  | 0.17305  |
| C | 3.91718  | 1.80117  | -0.02299 |
| C | 2.55614  | 1.98101  | -0.17069 |
| C | 4.21378  | -0.72780 | 0.15539  |
| C | 1.55088  | 0.98823  | -0.21953 |
| C | 2.96012  | -1.23108 | -0.11883 |
| C | 1.75972  | -0.46440 | -0.51026 |
| H | 5.71223  | 0.74005  | 0.36184  |
| H | 4.50898  | 2.71027  | 0.00605  |
| H | 2.21116  | 3.00976  | -0.20673 |
| H | 2.85363  | -2.31169 | -0.17429 |
| C | -0.58657 | 0.05049  | -0.11704 |
| C | 0.38227  | -1.12710 | -0.09113 |
| H | 1.75337  | -0.51726 | -1.62098 |
| C | 0.03794  | -2.22065 | -1.01036 |
| C | 0.47195  | -1.64802 | 1.28454  |
| N | -0.20396 | -3.05852 | -1.75660 |
| N | 0.54080  | -2.01929 | 2.36875  |
| H | 4.97963  | -1.47236 | 0.35071  |
| C | -1.98640 | 0.01955  | -0.03516 |
| C | -2.65966 | 1.28415  | -0.01143 |
| C | -2.76216 | -1.17103 | 0.05698  |
| C | -4.12951 | -1.10376 | 0.13683  |
| H | -2.27469 | -2.13937 | 0.07163  |
| C | -4.79382 | 0.14411  | 0.13386  |
| H | -4.70840 | -2.01742 | 0.20732  |
| H | -5.87515 | 0.17727  | 0.19453  |
| C | 0.15656  | 1.23723  | -0.14167 |
| C | -0.53365 | 2.48843  | -0.09017 |
| C | -1.89482 | 2.49252  | -0.04032 |
| H | -2.43153 | 3.43522  | -0.01320 |
| H | 0.01658  | 3.42156  | -0.10278 |
| C | -4.06784 | 1.31081  | 0.06605  |
| H | -4.57147 | 2.27195  | 0.07809  |

34

34-DHA cyclohexane Energy: -878.325623

|   |          |          |          |
|---|----------|----------|----------|
| C | 4.65349  | 0.60448  | 0.16119  |
| C | 3.91659  | 1.80285  | -0.01571 |
| C | 2.55148  | 1.98437  | -0.15442 |
| C | 4.21686  | -0.72449 | 0.13098  |
| C | 1.54967  | 0.99468  | -0.21157 |
| C | 2.95843  | -1.22542 | -0.13707 |
| C | 1.75722  | -0.45472 | -0.49957 |
| H | 5.71407  | 0.74162  | 0.34548  |
| H | 4.50732  | 2.71249  | 0.02232  |
| H | 2.20619  | 3.01364  | -0.17372 |
| H | 2.84824  | -2.30487 | -0.20660 |
| C | -0.58823 | 0.05362  | -0.11026 |
| C | 0.38275  | -1.12148 | -0.08016 |
| H | 1.74439  | -0.50121 | -1.61333 |
| C | 0.04842  | -2.21747 | -1.00057 |
| C | 0.47803  | -1.64389 | 1.29425  |
| N | -0.17731 | -3.05871 | -1.74838 |
| N | 0.55288  | -2.02730 | 2.37376  |
| H | 4.98394  | -1.47130 | 0.31194  |
| C | -1.99019 | 0.01890  | -0.03558 |
| C | -2.66630 | 1.27990  | -0.01440 |
| C | -2.76059 | -1.17384 | 0.05241  |
| C | -4.12759 | -1.11174 | 0.12854  |
| H | -2.26818 | -2.13956 | 0.06506  |
| C | -4.79626 | 0.13337  | 0.12553  |
| H | -4.70299 | -2.02784 | 0.19583  |
| H | -5.87794 | 0.16246  | 0.18389  |
| C | 0.14791  | 1.24007  | -0.13713 |
| C | -0.54395 | 2.48782  | -0.09023 |
| C | -1.90577 | 2.48876  | -0.04258 |
| H | -2.44495 | 3.43033  | -0.01671 |
| H | 0.00475  | 3.42204  | -0.10251 |
| C | -4.07548 | 1.30144  | 0.05970  |
| H | -4.58272 | 2.26084  | 0.07047  |

34

|                |          |             |          |
|----------------|----------|-------------|----------|
| 34-DHA ethanol | Energy:  | -878.336799 |          |
| C              | 4.65259  | 0.60238     | 0.17256  |
| C              | 3.91716  | 1.80127     | -0.02261 |
| C              | 2.55595  | 1.98118     | -0.16987 |
| C              | 4.21394  | -0.72764    | 0.15449  |
| C              | 1.55084  | 0.98853     | -0.21912 |
| C              | 2.96008  | -1.23083    | -0.11939 |
| C              | 1.75966  | -0.46399    | -0.50978 |
| H              | 5.71236  | 0.74016     | 0.36108  |
| H              | 4.50890  | 2.71041     | 0.00688  |
| H              | 2.21095  | 3.00995     | -0.20506 |
| H              | 2.85344  | -2.31141    | -0.17525 |
| C              | -0.58664 | 0.05064     | -0.11678 |
| C              | 0.38230  | -1.12685    | -0.09073 |
| H              | 1.75310  | -0.51658    | -1.62060 |
| C              | 0.03842  | -2.22041    | -1.01013 |
| C              | 0.47208  | -1.64806    | 1.28481  |
| N              | -0.20277 | -3.05835    | -1.75653 |
| N              | 0.54101  | -2.02015    | 2.36874  |
| H              | 4.97985  | -1.47228    | 0.34925  |
| C              | -1.98655 | 0.01954     | -0.03519 |
| C              | -2.65992 | 1.28400     | -0.01155 |
| C              | -2.76210 | -1.17112    | 0.05678  |
| C              | -4.12943 | -1.10406    | 0.13653  |
| H              | -2.27446 | -2.13937    | 0.07133  |
| C              | -4.79392 | 0.14370     | 0.13361  |
| H              | -4.70818 | -2.01782    | 0.20692  |
| H              | -5.87525 | 0.17670     | 0.19425  |
| C              | 0.15623  | 1.23737     | -0.14148 |
| C              | -0.53406 | 2.48843     | -0.09021 |
| C              | -1.89526 | 2.49239     | -0.04044 |
| H              | -2.43207 | 3.43505     | -0.01336 |
| H              | 0.01609  | 3.42161     | -0.10280 |
| C              | -4.06813 | 1.31045     | 0.06583  |
| H              | -4.57191 | 2.27152     | 0.07786  |

34

34-DHA toluene Energy: -878.327045

|   |          |          |          |
|---|----------|----------|----------|
| C | 4.65342  | 0.60436  | 0.16251  |
| C | 3.91654  | 1.80282  | -0.01579 |
| C | 2.55187  | 1.98409  | -0.15546 |
| C | 4.21664  | -0.72477 | 0.13332  |
| C | 1.54975  | 0.99404  | -0.21242 |
| C | 2.95878  | -1.22595 | -0.13536 |
| C | 1.75753  | -0.45570 | -0.50096 |
| H | 5.71392  | 0.74160  | 0.34721  |
| H | 4.50729  | 2.71244  | 0.02193  |
| H | 2.20650  | 3.01329  | -0.17578 |
| H | 2.84911  | -2.30555 | -0.20339 |
| C | -0.58810 | 0.05328  | -0.11114 |
| C | 0.38276  | -1.12201 | -0.08140 |
| H | 1.74514  | -0.50286 | -1.61434 |
| C | 0.04744  | -2.21787 | -1.00158 |
| C | 0.47741  | -1.64437 | 1.29312  |
| N | -0.17988 | -3.05890 | -1.74912 |
| N | 0.55141  | -2.02678 | 2.37304  |
| H | 4.98366  | -1.47133 | 0.31556  |
| C | -1.98981 | 0.01894  | -0.03564 |
| C | -2.66563 | 1.28033  | -0.01429 |
| C | -2.76081 | -1.17355 | 0.05307  |
| C | -4.12783 | -1.11088 | 0.12979  |
| H | -2.26900 | -2.13958 | 0.06605  |
| C | -4.79603 | 0.13453  | 0.12670  |
| H | -4.70359 | -2.02671 | 0.19771  |
| H | -5.87766 | 0.16407  | 0.18549  |
| C | 0.14882  | 1.23979  | -0.13783 |
| C | -0.54291 | 2.48791  | -0.09067 |
| C | -1.90465 | 2.48915  | -0.04278 |
| H | -2.44358 | 3.43084  | -0.01691 |
| H | 0.00590  | 3.42204  | -0.10317 |
| C | -4.07468 | 1.30244  | 0.06033  |
| H | -4.58154 | 2.26202  | 0.07118  |

34

34-TS vacuum Energy: -878.310900

|   |          |          |          |
|---|----------|----------|----------|
| C | -4.50845 | -0.56041 | 0.24375  |
| C | -3.78850 | -1.77649 | 0.15517  |
| C | -2.45027 | -1.97808 | -0.12731 |
| C | -4.13167 | 0.70154  | -0.18733 |
| C | -1.46938 | -1.00574 | -0.39466 |
| C | -2.95418 | 1.07031  | -0.85084 |
| C | -1.73862 | 0.35639  | -0.91541 |
| H | -5.51218 | -0.64523 | 0.64767  |
| H | -4.34715 | -2.66677 | 0.42635  |
| H | -2.08975 | -2.99653 | -0.00723 |
| H | -2.96173 | 2.02164  | -1.37612 |
| C | 0.62816  | 0.00588  | -0.04025 |
| C | -0.32684 | 1.13168  | 0.09874  |
| H | -1.19815 | 0.52980  | -1.85156 |
| C | -0.02772 | 2.40645  | -0.51138 |
| C | -0.93946 | 1.25931  | 1.40515  |
| N | 0.15230  | 3.40348  | -1.05668 |
| N | -1.45297 | 1.35434  | 2.42989  |
| H | -4.88984 | 1.47497  | -0.10697 |
| C | 2.04772  | 0.05284  | -0.00650 |
| C | 2.73752  | -1.19501 | -0.05746 |
| C | 2.80632  | 1.24262  | 0.13349  |
| C | 4.17845  | 1.19553  | 0.17397  |
| H | 2.30690  | 2.20020  | 0.20905  |
| C | 4.85921  | -0.03491 | 0.09534  |
| H | 4.74195  | 2.11599  | 0.27423  |
| H | 5.94217  | -0.05639 | 0.13001  |
| C | -0.07298 | -1.20409 | -0.18170 |
| C | 0.63887  | -2.44028 | -0.16069 |
| C | 1.99706  | -2.41993 | -0.11821 |
| H | 2.55491  | -3.35067 | -0.13852 |
| H | 0.10625  | -3.38128 | -0.23281 |
| C | 4.14637  | -1.20600 | -0.00963 |
| H | 4.66177  | -2.16019 | -0.05193 |

34

34-TS acetonitrile Energy: -878.295826

|   |          |          |          |
|---|----------|----------|----------|
| C | -4.67751 | 0.46042  | -0.17402 |
| C | -3.92588 | 1.66701  | 0.11475  |
| C | -2.56740 | 1.94511  | 0.14990  |
| C | -4.22753 | -0.69195 | -0.76461 |
| C | -1.53099 | 0.99695  | 0.10570  |
| C | -2.81797 | -0.82440 | -1.02543 |
| C | -1.99218 | -0.43105 | 0.06773  |
| H | -5.75181 | 0.56217  | -0.04784 |
| H | -4.56352 | 2.52942  | 0.28616  |
| H | -2.29450 | 2.98890  | 0.27074  |
| H | -2.44909 | -0.78537 | -2.05022 |
| C | 0.60363  | -0.00378 | 0.09155  |
| C | -0.26805 | -1.21112 | 0.27163  |
| H | -2.50085 | -0.65048 | 1.01218  |
| C | -0.33379 | -1.67446 | 1.64053  |
| C | -0.12286 | -2.28502 | -0.68513 |
| N | -0.41166 | -2.00861 | 2.73995  |
| N | -0.08739 | -3.10430 | -1.49166 |
| H | -4.95295 | -1.43135 | -1.09923 |
| C | 2.01485  | 0.00080  | -0.04405 |
| C | 2.66364  | 1.27079  | -0.13570 |
| C | 2.81902  | -1.17112 | -0.05308 |
| C | 4.18028  | -1.08568 | -0.20785 |
| H | 2.36389  | -2.14427 | 0.07905  |
| C | 4.81254  | 0.16900  | -0.33860 |
| H | 4.77664  | -1.99055 | -0.21599 |
| H | 5.88829  | 0.22076  | -0.45797 |
| C | -0.13006 | 1.18962  | 0.15075  |
| C | 0.54569  | 2.44887  | 0.12081  |
| C | 1.89488  | 2.47519  | -0.03663 |
| H | 2.41968  | 3.42351  | -0.08558 |
| H | -0.02002 | 3.37005  | 0.19220  |
| C | 4.06500  | 1.32242  | -0.29089 |
| H | 4.54579  | 2.29210  | -0.36560 |

34

34-TS cyclohexane Energy: -878.317246

|   |          |          |          |
|---|----------|----------|----------|
| C | -4.50939 | -0.56724 | 0.25171  |
| C | -3.78776 | -1.78317 | 0.15032  |
| C | -2.45108 | -1.98060 | -0.13639 |
| C | -4.13693 | 0.69733  | -0.17448 |
| C | -1.47107 | -1.00163 | -0.39229 |
| C | -2.96305 | 1.07031  | -0.84317 |
| C | -1.74617 | 0.35939  | -0.91475 |
| H | -5.51142 | -0.65673 | 0.65870  |
| H | -4.34559 | -2.67634 | 0.41316  |
| H | -2.09005 | -3.00023 | -0.03076 |
| H | -2.97725 | 2.02136  | -1.36866 |
| C | 0.62911  | 0.00887  | -0.04086 |
| C | -0.32017 | 1.13944  | 0.09491  |
| H | -1.20998 | 0.53317  | -1.85293 |
| C | -0.01937 | 2.41010  | -0.52096 |
| C | -0.93058 | 1.27502  | 1.40043  |
| N | 0.16032  | 3.40530  | -1.06994 |
| N | -1.44324 | 1.37649  | 2.42525  |
| H | -4.89693 | 1.46845  | -0.08923 |
| C | 2.04818  | 0.05097  | -0.00585 |
| C | 2.73452  | -1.19925 | -0.05701 |
| C | 2.81046  | 1.23869  | 0.13576  |
| C | 4.18274  | 1.18795  | 0.17504  |
| H | 2.31407  | 2.19748  | 0.21635  |
| C | 4.85978  | -0.04478 | 0.09395  |
| H | 4.74915  | 2.10637  | 0.27717  |
| H | 5.94266  | -0.06935 | 0.12770  |
| C | -0.07681 | -1.20027 | -0.17772 |
| C | 0.63198  | -2.43936 | -0.15280 |
| C | 1.99017  | -2.42272 | -0.11404 |
| H | 2.54498  | -3.35515 | -0.13305 |
| H | 0.09721  | -3.37940 | -0.21932 |
| C | 4.14335  | -1.21444 | -0.01069 |
| H | 4.65616  | -2.16991 | -0.05298 |

34

34-TS ethanol Energy: -878.327025

|   |          |          |          |
|---|----------|----------|----------|
| C | -4.50935 | -0.57693 | 0.26742  |
| C | -3.78571 | -1.79296 | 0.14349  |
| C | -2.45269 | -1.98411 | -0.15396 |
| C | -4.14425 | 0.69156  | -0.15246 |
| C | -1.47370 | -0.99450 | -0.39113 |
| C | -2.97652 | 1.07180  | -0.82970 |
| C | -1.75764 | 0.36540  | -0.91401 |
| H | -5.50860 | -0.67400 | 0.67936  |
| H | -4.34272 | -2.69070 | 0.39138  |
| H | -2.09148 | -3.00583 | -0.07649 |
| H | -3.00145 | 2.02243  | -1.35526 |
| C | 0.63025  | 0.01392  | -0.04341 |
| C | -0.30988 | 1.15260  | 0.08797  |
| H | -1.22875 | 0.54118  | -1.85538 |
| C | -0.00594 | 2.41733  | -0.53528 |
| C | -0.91648 | 1.29764  | 1.39210  |
| N | 0.17571  | 3.41081  | -1.08703 |
| N | -1.43025 | 1.40224  | 2.41664  |
| H | -4.90792 | 1.45839  | -0.06038 |
| C | 2.04832  | 0.04814  | -0.00494 |
| C | 2.72914  | -1.20601 | -0.05565 |
| C | 2.81666  | 1.23266  | 0.13923  |
| C | 4.18909  | 1.17564  | 0.17786  |
| H | 2.32501  | 2.19339  | 0.22636  |
| C | 4.86020  | -0.06098 | 0.09414  |
| H | 4.76051  | 2.09057  | 0.28293  |
| H | 5.94288  | -0.09063 | 0.12724  |
| C | -0.08296 | -1.19380 | -0.17440 |
| C | 0.62072  | -2.43753 | -0.14302 |
| C | 1.97886  | -2.42712 | -0.10818 |
| H | 2.52912  | -3.36203 | -0.12525 |
| H | 0.08223  | -3.37559 | -0.20257 |
| C | 4.13800  | -1.22818 | -0.01045 |
| H | 4.64614  | -2.18596 | -0.05296 |

34

34-TS toluene Energy: -878.318502

|   |          |          |          |
|---|----------|----------|----------|
| C | -4.50954 | -0.56853 | 0.25337  |
| C | -3.78748 | -1.78442 | 0.14968  |
| C | -2.45115 | -1.98102 | -0.13798 |
| C | -4.13791 | 0.69656  | -0.17188 |
| C | -1.47134 | -1.00082 | -0.39208 |
| C | -2.96468 | 1.07045  | -0.84144 |
| C | -1.74759 | 0.36007  | -0.91455 |
| H | -5.51128 | -0.65898 | 0.66081  |
| H | -4.34509 | -2.67813 | 0.41106  |
| H | -2.08996 | -3.00084 | -0.03521 |
| H | -2.98012 | 2.02153  | -1.36680 |
| C | 0.62929  | 0.00946  | -0.04121 |
| C | -0.31908 | 1.14087  | 0.09411  |
| H | -1.21232 | 0.53410  | -1.85315 |
| C | -0.01823 | 2.41079  | -0.52292 |
| C | -0.92869 | 1.27767  | 1.39965  |
| N | 0.16122  | 3.40561  | -1.07268 |
| N | -1.44098 | 1.37969  | 2.42467  |
| H | -4.89830 | 1.46720  | -0.08573 |
| C | 2.04824  | 0.05071  | -0.00576 |
| C | 2.73398  | -1.19993 | -0.05704 |
| C | 2.81118  | 1.23805  | 0.13638  |
| C | 4.18348  | 1.18665  | 0.17557  |
| H | 2.31533  | 2.19705  | 0.21793  |
| C | 4.85988  | -0.04649 | 0.09397  |
| H | 4.75042  | 2.10468  | 0.27819  |
| H | 5.94274  | -0.07162 | 0.12768  |
| C | -0.07746 | -1.19952 | -0.17739 |
| C | 0.63079  | -2.43913 | -0.15187 |
| C | 1.98897  | -2.42315 | -0.11367 |
| H | 2.54327  | -3.35586 | -0.13253 |
| H | 0.09563  | -3.37898 | -0.21751 |
| C | 4.14281  | -1.21588 | -0.01084 |
| H | 4.65515  | -2.17158 | -0.05321 |

34

34-VHF vacuum      Energy: -878.342487

|   |          |          |          |
|---|----------|----------|----------|
| C | 4.70516  | -0.36397 | -0.68592 |
| C | 3.60417  | -0.74871 | -1.54217 |
| C | 2.29745  | -0.93564 | -1.20291 |
| C | 4.70989  | -0.19548 | 0.65486  |
| C | 1.64978  | -0.78739 | 0.05293  |
| C | 3.60941  | -0.33370 | 1.58030  |
| C | 2.29662  | -0.58497 | 1.29549  |
| H | 5.64983  | -0.20679 | -1.19656 |
| H | 3.85584  | -0.89449 | -2.58620 |
| H | 1.63772  | -1.20644 | -2.02389 |
| H | 3.85745  | -0.19969 | 2.62661  |
| C | -0.71342 | 0.19749  | -0.04647 |
| C | -0.21030 | 1.53919  | -0.03464 |
| H | 1.63402  | -0.60875 | 2.15783  |
| C | -0.96741 | 2.64759  | 0.42986  |
| C | 1.11051  | 1.91746  | -0.37683 |
| N | -1.52986 | 3.57311  | 0.82922  |
| N | 2.14841  | 2.32425  | -0.67779 |
| H | 5.65795  | 0.08171  | 1.10469  |
| C | -2.14979 | -0.05326 | -0.09756 |
| C | -2.63393 | -1.36547 | 0.14960  |
| C | -3.09910 | 0.92910  | -0.46208 |
| C | -4.44561 | 0.64779  | -0.48434 |
| H | -2.78217 | 1.91688  | -0.76094 |
| C | -4.92136 | -0.63369 | -0.15664 |
| H | -5.14395 | 1.42555  | -0.77015 |
| H | -5.98529 | -0.83878 | -0.16738 |
| C | 0.16213  | -0.90662 | 0.06306  |
| C | -0.36608 | -2.19761 | 0.26083  |
| C | -1.71245 | -2.42512 | 0.34588  |
| H | -2.09299 | -3.42371 | 0.53305  |
| H | 0.33332  | -3.01707 | 0.37766  |
| C | -4.02381 | -1.62615 | 0.13915  |
| H | -4.36277 | -2.63480 | 0.35096  |

34

34-VHF acetonitrile Energy: -878.341682

|   |          |          |          |
|---|----------|----------|----------|
| C | -4.60593 | -0.59559 | 0.31070  |
| C | -3.76069 | -1.66449 | 0.64873  |
| C | -2.37946 | -1.75592 | 0.42322  |
| C | -4.35896 | 0.50668  | -0.48379 |
| C | -1.55388 | -0.91954 | -0.30028 |
| C | -3.20527 | 0.73431  | -1.29219 |
| C | -1.99826 | 0.11413  | -1.23666 |
| H | -5.60436 | -0.64867 | 0.73653  |
| H | -4.19776 | -2.45066 | 1.25198  |
| H | -1.87991 | -2.56126 | 0.95840  |
| H | -3.30677 | 1.51109  | -2.04496 |
| C | 0.68268  | 0.10277  | 0.05798  |
| C | -0.00744 | 1.36658  | 0.27673  |
| H | -1.26592 | 0.40147  | -1.98478 |
| C | 0.38862  | 2.57156  | -0.35078 |
| C | -1.08847 | 1.46903  | 1.17711  |
| N | 0.69039  | 3.54869  | -0.88682 |
| N | -1.96295 | 1.55696  | 1.92931  |
| H | -5.17173 | 1.21349  | -0.60250 |
| C | 2.11849  | 0.01435  | 0.07360  |
| C | 2.72330  | -1.25557 | -0.14276 |
| C | 2.96636  | 1.11342  | 0.36287  |
| C | 4.33283  | 0.96834  | 0.36531  |
| H | 2.54657  | 2.08085  | 0.60428  |
| C | 4.92802  | -0.28143 | 0.10000  |
| H | 4.95913  | 1.82509  | 0.58486  |
| H | 6.00702  | -0.37871 | 0.10415  |
| C | -0.09769 | -1.05004 | -0.15123 |
| C | 0.53882  | -2.30342 | -0.31294 |
| C | 1.90145  | -2.40123 | -0.32369 |
| H | 2.37733  | -3.36278 | -0.48406 |
| H | -0.07263 | -3.17986 | -0.49432 |
| C | 4.13291  | -1.37386 | -0.13759 |
| H | 4.57231  | -2.35005 | -0.31301 |

34

34-VHF cyclohexane Energy: -878.342559

|   |          |          |          |
|---|----------|----------|----------|
| C | 4.69757  | -0.39972 | -0.69289 |
| C | 3.59445  | -0.78029 | -1.54671 |
| C | 2.28191  | -0.93616 | -1.20963 |
| C | 4.69935  | -0.19845 | 0.64371  |
| C | 1.63718  | -0.77701 | 0.04535  |
| C | 3.59425  | -0.31049 | 1.57109  |
| C | 2.28297  | -0.55835 | 1.29388  |
| H | 5.64623  | -0.26600 | -1.20278 |
| H | 3.84599  | -0.94285 | -2.58813 |
| H | 1.61836  | -1.19742 | -2.03074 |
| H | 3.84448  | -0.15988 | 2.61481  |
| C | -0.71389 | 0.19191  | -0.05319 |
| C | -0.19323 | 1.52446  | -0.03431 |
| H | 1.61845  | -0.56718 | 2.15481  |
| C | -0.94726 | 2.64108  | 0.42138  |
| C | 1.13314  | 1.90092  | -0.36146 |
| N | -1.50111 | 3.57277  | 0.81688  |
| N | 2.16794  | 2.32881  | -0.64606 |
| H | 5.64804  | 0.07959  | 1.09103  |
| C | -2.15063 | -0.04983 | -0.10279 |
| C | -2.63834 | -1.35684 | 0.16188  |
| C | -3.09268 | 0.93240  | -0.48338 |
| C | -4.44110 | 0.65612  | -0.50583 |
| H | -2.76874 | 1.91335  | -0.79851 |
| C | -4.92147 | -0.61893 | -0.16184 |
| H | -5.13612 | 1.43162  | -0.80524 |
| H | -5.98596 | -0.82048 | -0.17341 |
| C | 0.15836  | -0.91531 | 0.06448  |
| C | -0.37270 | -2.20258 | 0.28645  |
| C | -1.71999 | -2.41921 | 0.37572  |
| H | -2.10637 | -3.41268 | 0.57682  |
| H | 0.32362  | -3.02300 | 0.41380  |
| C | -4.02838 | -1.61210 | 0.15086  |
| H | -4.37284 | -2.61597 | 0.37535  |

34

|                |                     |          |          |
|----------------|---------------------|----------|----------|
| 34-VHF ethanol | Energy: -878.341552 |          |          |
| C              | -4.60589            | -0.59547 | 0.31279  |
| C              | -3.76006            | -1.66164 | 0.65507  |
| C              | -2.37794            | -1.75231 | 0.42939  |
| C              | -4.36008            | 0.50453  | -0.48594 |
| C              | -1.55452            | -0.92001 | -0.29955 |
| C              | -3.20700            | 0.73010  | -1.29543 |
| C              | -1.99987            | 0.11019  | -1.23938 |
| H              | -5.60436            | -0.64782 | 0.73866  |
| H              | -4.19579            | -2.44544 | 1.26232  |
| H              | -1.87692            | -2.55361 | 0.96928  |
| H              | -3.30900            | 1.50507  | -2.05001 |
| C              | 0.68271             | 0.10276  | 0.05829  |
| C              | -0.00688            | 1.36721  | 0.27656  |
| H              | -1.26771            | 0.39620  | -1.98816 |
| C              | 0.39019             | 2.57145  | -0.35156 |
| C              | -1.08928            | 1.47046  | 1.17497  |
| N              | 0.69288             | 3.54808  | -0.88804 |
| N              | -1.96493            | 1.55915  | 1.92575  |
| H              | -5.17340            | 1.21030  | -0.60664 |
| C              | 2.11852             | 0.01414  | 0.07437  |
| C              | 2.72341             | -1.25549 | -0.14342 |
| C              | 2.96634             | 1.11289  | 0.36514  |
| C              | 4.33271             | 0.96779  | 0.36793  |
| H              | 2.54647             | 2.08008  | 0.60731  |
| C              | 4.92805             | -0.28174 | 0.10142  |
| H              | 4.95893             | 1.82429  | 0.58862  |
| H              | 6.00706             | -0.37898 | 0.10588  |
| C              | -0.09732            | -1.04962 | -0.15193 |
| C              | 0.53901             | -2.30254 | -0.31609 |
| C              | 1.90174             | -2.40065 | -0.32650 |
| H              | 2.37755             | -3.36204 | -0.48804 |
| H              | -0.07279            | -3.17851 | -0.49862 |
| C              | 4.13314             | -1.37378 | -0.13782 |
| H              | 4.57258             | -2.34976 | -0.31433 |

34

34-VHF toluene Energy: -878.343354

|   |          |          |          |
|---|----------|----------|----------|
| C | 4.69501  | -0.40160 | -0.69359 |
| C | 3.59247  | -0.78466 | -1.54694 |
| C | 2.27964  | -0.93915 | -1.21036 |
| C | 4.69625  | -0.19651 | 0.64252  |
| C | 1.63475  | -0.77755 | 0.04444  |
| C | 3.59099  | -0.30776 | 1.57013  |
| C | 2.28015  | -0.55698 | 1.29387  |
| H | 5.64382  | -0.26900 | -1.20345 |
| H | 3.84465  | -0.95031 | -2.58772 |
| H | 1.61620  | -1.20185 | -2.03112 |
| H | 3.84140  | -0.15570 | 2.61363  |
| C | -0.71375 | 0.19095  | -0.05388 |
| C | -0.18959 | 1.52146  | -0.03438 |
| H | 1.61542  | -0.56545 | 2.15461  |
| C | -0.94192 | 2.64064  | 0.41883  |
| C | 1.13820  | 1.89564  | -0.35879 |
| N | -1.49319 | 3.57436  | 0.81288  |
| N | 2.17327  | 2.32490  | -0.64092 |
| H | 5.64458  | 0.08322  | 1.08946  |
| C | -2.15083 | -0.04859 | -0.10314 |
| C | -2.63984 | -1.35461 | 0.16354  |
| C | -3.09121 | 0.93434  | -0.48551 |
| C | -4.44018 | 0.65970  | -0.50776 |
| H | -2.76570 | 1.91411  | -0.80293 |
| C | -4.92196 | -0.61416 | -0.16176 |
| H | -5.13427 | 1.43537  | -0.80881 |
| H | -5.98665 | -0.81454 | -0.17329 |
| C | 0.15725  | -0.91763 | 0.06426  |
| C | -0.37509 | -2.20420 | 0.28860  |
| C | -1.72260 | -2.41830 | 0.37876  |
| H | -2.11051 | -3.41086 | 0.58122  |
| H | 0.32014  | -3.02542 | 0.41668  |
| C | -4.03003 | -1.60820 | 0.15274  |
| H | -4.37589 | -2.61123 | 0.37865  |

38

|               |          |             |          |
|---------------|----------|-------------|----------|
| 56-DHA vacuum | Energy:  | -955.676573 |          |
| C             | 2.79650  | 1.59718     | -0.19494 |
| C             | 1.47856  | 1.74043     | -0.51280 |
| C             | 3.62100  | 0.44455     | -0.03564 |
| C             | 0.47240  | 0.69119     | -0.72764 |
| H             | 0.27282  | 0.67036     | -1.81541 |
| C             | 0.67541  | -0.73422    | -0.32704 |
| C             | 3.20208  | -0.95307    | -0.12186 |
| C             | 1.89094  | -1.42769    | -0.23292 |
| H             | 1.78546  | -2.50855    | -0.16155 |
| C             | -0.59266 | -1.31241    | -0.11825 |
| C             | -0.96692 | 0.99864     | -0.10868 |
| C             | -1.61515 | -0.38360    | -0.08058 |
| H             | -0.73688 | -2.37412    | 0.04563  |
| C             | -0.79960 | 1.50078     | 1.26542  |
| C             | -1.66484 | 1.99998     | -0.92589 |
| N             | -2.15842 | 2.78245     | -1.60577 |
| N             | -0.65670 | 1.87725     | 2.34083  |
| C             | -5.79128 | -1.11120    | 0.23155  |
| C             | -4.92856 | -2.11720    | -0.20365 |
| C             | -3.57142 | -1.87296    | -0.31727 |
| C             | -3.03370 | -0.61040    | 0.01074  |
| C             | -3.91919 | 0.39415     | 0.45009  |
| C             | -5.27760 | 0.14247     | 0.55585  |
| H             | -6.85475 | -1.30305    | 0.31505  |
| H             | -5.32190 | -3.09239    | -0.46812 |
| H             | -2.91546 | -2.65157    | -0.69090 |
| H             | -3.54148 | 1.36948     | 0.73790  |
| H             | -5.94003 | 0.92784     | 0.90140  |
| H             | 3.33962  | 2.53425     | -0.10473 |
| H             | 1.12261  | 2.75099     | -0.70168 |
| C             | 4.99702  | 0.70284     | 0.19214  |
| H             | 5.30945  | 1.73913     | 0.26823  |
| C             | 4.22497  | -1.95427    | -0.00188 |
| H             | 3.91920  | -2.99310    | -0.07013 |
| C             | 5.53674  | -1.64813    | 0.20136  |
| H             | 6.27394  | -2.43770    | 0.28982  |
| C             | 5.93490  | -0.28884    | 0.30737  |
| H             | 6.97565  | -0.03866    | 0.47626  |

38

56-DHA acetonitrile Energy: -955.699449

|   |          |          |          |
|---|----------|----------|----------|
| C | 2.79627  | 1.61139  | -0.00311 |
| C | 1.48626  | 1.77244  | -0.28516 |
| C | 3.64226  | 0.44286  | 0.03166  |
| C | 0.49228  | 0.73515  | -0.65918 |
| H | 0.40214  | 0.75108  | -1.75793 |
| C | 0.68484  | -0.70474 | -0.27570 |
| C | 3.21937  | -0.94120 | -0.11395 |
| C | 1.90935  | -1.40883 | -0.21436 |
| H | 1.79786  | -2.49047 | -0.19260 |
| C | -0.56080 | -1.29429 | -0.09270 |
| C | -0.98180 | 1.02150  | -0.14579 |
| C | -1.61508 | -0.37161 | -0.10158 |
| H | -0.69039 | -2.35517 | 0.08271  |
| C | -0.93624 | 1.57302  | 1.22108  |
| C | -1.65511 | 1.97081  | -1.04298 |
| N | -2.14294 | 2.70426  | -1.77914 |
| N | -0.88859 | 1.96473  | 2.29980  |
| C | -5.77146 | -1.16997 | 0.23101  |
| C | -4.87038 | -2.19730 | -0.06398 |
| C | -3.51877 | -1.93435 | -0.17963 |
| C | -3.01259 | -0.61867 | -0.00123 |
| C | -3.94419 | 0.40788  | 0.30170  |
| C | -5.29509 | 0.13034  | 0.41346  |
| H | -6.83075 | -1.38071 | 0.31898  |
| H | -5.23215 | -3.20850 | -0.21197 |
| H | -2.83955 | -2.73950 | -0.43449 |
| H | -3.60596 | 1.42280  | 0.47928  |
| H | -5.98510 | 0.93109  | 0.65377  |
| H | 3.33571  | 2.53599  | 0.18388  |
| H | 1.11689  | 2.79458  | -0.32765 |
| C | 5.01580  | 0.69390  | 0.21829  |
| H | 5.33346  | 1.72418  | 0.33992  |
| C | 4.24514  | -1.95287 | -0.08022 |
| H | 3.93494  | -2.98639 | -0.19108 |
| C | 5.56617  | -1.65517 | 0.08630  |
| H | 6.30589  | -2.44686 | 0.10343  |
| C | 5.96491  | -0.30629 | 0.24380  |
| H | 7.01075  | -0.05906 | 0.38281  |

56-DHA cyclohexane Energy: -955.685108

|   |          |          |          |
|---|----------|----------|----------|
| C | 2.79825  | 1.60487  | -0.10266 |
| C | 1.48438  | 1.75875  | -0.40544 |
| C | 3.63136  | 0.44346  | -0.00017 |
| C | 0.48266  | 0.71329  | -0.69365 |
| H | 0.33602  | 0.70951  | -1.78867 |
| C | 0.68114  | -0.71919 | -0.30377 |
| C | 3.21102  | -0.94788 | -0.12004 |
| C | 1.89995  | -1.41832 | -0.22784 |
| H | 1.79168  | -2.49990 | -0.18172 |
| C | -0.57800 | -1.30272 | -0.10778 |
| C | -0.97481 | 1.00981  | -0.12670 |
| C | -1.61473 | -0.37847 | -0.09117 |
| H | -0.71449 | -2.36413 | 0.06175  |
| C | -0.86849 | 1.53785  | 1.24453  |
| C | -1.66029 | 1.98642  | -0.98406 |
| N | -2.14775 | 2.74745  | -1.69208 |
| N | -0.77368 | 1.92708  | 2.32085  |
| C | -5.78190 | -1.14121 | 0.23389  |
| C | -4.90067 | -2.16079 | -0.13069 |
| C | -3.54634 | -1.90711 | -0.24787 |
| C | -3.02460 | -0.61608 | 0.00409  |
| C | -3.93174 | 0.40189  | 0.37481  |
| C | -5.28665 | 0.13815  | 0.48469  |
| H | -6.84325 | -1.34224 | 0.32117  |
| H | -5.27867 | -3.15625 | -0.33481 |
| H | -2.87925 | -2.70156 | -0.56289 |
| H | -3.57305 | 1.39880  | 0.60650  |
| H | -5.96230 | 0.93388  | 0.77665  |
| H | 3.34047  | 2.53687  | 0.03222  |
| H | 1.12362  | 2.77762  | -0.52778 |
| C | 5.00679  | 0.69666  | 0.21234  |
| H | 5.32118  | 1.73006  | 0.31439  |
| C | 4.23553  | -1.95492 | -0.04417 |
| H | 3.92795  | -2.99097 | -0.13852 |
| C | 5.55093  | -1.65427 | 0.14542  |
| H | 6.28953  | -2.44559 | 0.19667  |
| C | 5.94927  | -0.29949 | 0.28334  |
| H | 6.99233  | -0.05195 | 0.44113  |

|                |          |             |          |
|----------------|----------|-------------|----------|
| 56-DHA ethanol | Energy:  | -955.699017 |          |
| C              | 2.79646  | 1.61118     | -0.00443 |
| C              | 1.48626  | 1.77213     | -0.28651 |
| C              | 3.64220  | 0.44286     | 0.03112  |
| C              | 0.49222  | 0.73463     | -0.65907 |
| H              | 0.40144  | 0.75016     | -1.75784 |
| C              | 0.68487  | -0.70511    | -0.27555 |
| C              | 3.21930  | -0.94136    | -0.11383 |
| C              | 1.90915  | -1.40904    | -0.21398 |
| H              | 1.79778  | -2.49069    | -0.19142 |
| C              | -0.56128 | -1.29448    | -0.09251 |
| C              | -0.98167 | 1.02117     | -0.14515 |
| C              | -1.61505 | -0.37184    | -0.10103 |
| H              | -0.69112 | -2.35536    | 0.08287  |
| C              | -0.93552 | 1.57272     | 1.22164  |
| C              | -1.65487 | 1.97093     | -1.04204 |
| N              | -2.14228 | 2.70491     | -1.77794 |
| N              | -0.88747 | 1.96512     | 2.30008  |
| C              | -5.77177 | -1.16942    | 0.23042  |
| C              | -4.87104 | -2.19670    | -0.06553 |
| C              | -3.51936 | -1.93393    | -0.18093 |
| C              | -3.01295 | -0.61873    | -0.00116 |
| C              | -3.94405 | 0.40771     | 0.30267  |
| C              | -5.29507 | 0.13051     | 0.41406  |
| H              | -6.83113 | -1.37993    | 0.31814  |
| H              | -5.23312 | -3.20765    | -0.21454 |
| H              | -2.84029 | -2.73895    | -0.43666 |
| H              | -3.60543 | 1.42232     | 0.48121  |
| H              | -5.98482 | 0.93128     | 0.65503  |
| H              | 3.33593  | 2.53593     | 0.18176  |
| H              | 1.11688  | 2.79424     | -0.32998 |
| C              | 5.01590  | 0.69390     | 0.21767  |
| H              | 5.33358  | 1.72423     | 0.33882  |
| C              | 4.24502  | -1.95292    | -0.07959 |
| H              | 3.93480  | -2.98650    | -0.18990 |
| C              | 5.56599  | -1.65521    | 0.08682  |
| H              | 6.30565  | -2.44695    | 0.10439  |
| C              | 5.96484  | -0.30620    | 0.24369  |
| H              | 7.01069  | -0.05901    | 0.38262  |

38

|                |          |             |          |
|----------------|----------|-------------|----------|
| 56-DHA toluene | Energy:  | -955.686856 |          |
| C              | 2.79858  | 1.60600     | -0.08728 |
| C              | 1.48511  | 1.76131     | -0.38612 |
| C              | 3.63345  | 0.44331     | 0.00480  |
| C              | 0.48435  | 0.71682     | -0.68721 |
| H              | 0.34689  | 0.71584     | -1.78313 |
| C              | 0.68195  | -0.71678    | -0.29845 |
| C              | 3.21247  | -0.94694    | -0.11859 |
| C              | 1.90138  | -1.41671    | -0.22472 |
| H              | 1.79253  | -2.49832    | -0.18174 |
| C              | -0.57551 | -1.30115    | -0.10475 |
| C              | -0.97609 | 1.01176     | -0.12946 |
| C              | -1.61471 | -0.37739    | -0.09224 |
| H              | -0.71103 | -2.36246    | 0.06587  |
| C              | -0.88029 | 1.54479     | 1.24079  |
| C              | -1.65948 | 1.98347     | -0.99420 |
| N              | -2.14643 | 2.73993     | -1.70743 |
| N              | -0.79385 | 1.93624     | 2.31703  |
| C              | -5.78021 | -1.14634    | 0.23318  |
| C              | -4.89577 | -2.16721    | -0.12074 |
| C              | -3.54190 | -1.91179    | -0.23762 |
| C              | -3.02293 | -0.61674    | 0.00330  |
| C              | -3.93389 | 0.40262     | 0.36349  |
| C              | -5.28816 | 0.13656     | 0.47350  |
| H              | -6.84124 | -1.34905    | 0.32052  |
| H              | -5.27111 | -3.16538    | -0.31636 |
| H              | -2.87267 | -2.70795    | -0.54352 |
| H              | -3.57847 | 1.40254     | 0.58697  |
| H              | -5.96617 | 0.93318     | 0.75745  |
| H              | 3.34057  | 2.53703     | 0.05496  |
| H              | 1.12309  | 2.78114     | -0.49602 |
| C              | 5.00887  | 0.69584     | 0.21274  |
| H              | 5.32396  | 1.72876     | 0.31748  |
| C              | 4.23708  | -1.95493    | -0.04934 |
| H              | 3.92883  | -2.99056    | -0.14592 |
| C              | 5.55340  | -1.65502    | 0.13612  |
| H              | 6.29208  | -2.44659    | 0.18201  |
| C              | 5.95212  | -0.30107    | 0.27665  |
| H              | 6.99576  | -0.05387    | 0.43115  |

38

56-TS vacuum Energy: -955.670210

|   |          |          |          |
|---|----------|----------|----------|
| C | 2.75085  | 1.52747  | -0.57489 |
| C | 1.46976  | 1.58404  | -1.09266 |
| C | 3.53561  | 0.41898  | -0.18435 |
| C | 0.46103  | 0.59430  | -1.04740 |
| H | -0.16845 | 0.57096  | -1.93957 |
| C | 0.60464  | -0.76182 | -0.45120 |
| C | 3.12242  | -0.97524 | -0.17834 |
| C | 1.81003  | -1.45423 | -0.29285 |
| H | 1.69388  | -2.52031 | -0.10310 |
| C | -0.64268 | -1.28230 | -0.05905 |
| C | -1.01879 | 1.02105  | 0.08736  |
| C | -1.63835 | -0.31718 | 0.05967  |
| H | -0.79354 | -2.33164 | 0.16889  |
| C | -0.32442 | 1.37505  | 1.30983  |
| C | -1.72866 | 2.13674  | -0.50034 |
| N | -2.23490 | 3.02266  | -1.03144 |
| N | 0.24555  | 1.65804  | 2.26802  |
| C | -5.82554 | -1.07201 | 0.16095  |
| C | -4.95850 | -1.99199 | -0.42556 |
| C | -3.59757 | -1.73489 | -0.47218 |
| C | -3.07068 | -0.55346 | 0.07970  |
| C | -3.95650 | 0.36135  | 0.67412  |
| C | -5.31873 | 0.10451  | 0.70724  |
| H | -6.89055 | -1.27127 | 0.19155  |
| H | -5.34887 | -2.90513 | -0.86039 |
| H | -2.93131 | -2.43603 | -0.96328 |
| H | -3.57198 | 1.26470  | 1.13511  |
| H | -5.98737 | 0.82027  | 1.17129  |
| H | 3.29458  | 2.46800  | -0.59611 |
| H | 1.18718  | 2.50927  | -1.58857 |
| C | 4.89290  | 0.69973  | 0.15134  |
| H | 5.20123  | 1.73952  | 0.16848  |
| C | 4.12315  | -1.96464 | 0.09720  |
| H | 3.81765  | -3.00562 | 0.08644  |
| C | 5.41460  | -1.64271 | 0.38863  |
| H | 6.13802  | -2.42165 | 0.59846  |
| C | 5.80504  | -0.27800 | 0.42961  |
| H | 6.82749  | -0.01443 | 0.67373  |

38

56-TS acetonitrile Energy: -955.688623

|   |          |          |          |
|---|----------|----------|----------|
| C | 2.76719  | 1.53255  | -0.57100 |
| C | 1.48530  | 1.60099  | -1.07936 |
| C | 3.54699  | 0.41443  | -0.18248 |
| C | 0.47109  | 0.61418  | -1.04380 |
| H | -0.15588 | 0.59250  | -1.93705 |
| C | 0.60501  | -0.73888 | -0.43650 |
| C | 3.12282  | -0.97591 | -0.17679 |
| C | 1.80981  | -1.44642 | -0.29379 |
| H | 1.68543  | -2.51436 | -0.12453 |
| C | -0.63170 | -1.25981 | -0.03479 |
| C | -1.04029 | 1.04473  | 0.09541  |
| C | -1.64306 | -0.30068 | 0.07204  |
| H | -0.77231 | -2.30813 | 0.20277  |
| C | -0.34198 | 1.41077  | 1.30846  |
| C | -1.75718 | 2.15138  | -0.49484 |
| N | -2.27321 | 3.03271  | -1.02506 |
| N | 0.23867  | 1.70096  | 2.25902  |
| C | -5.81899 | -1.11437 | 0.13834  |
| C | -4.92901 | -2.03372 | -0.41760 |
| C | -3.57084 | -1.75928 | -0.44965 |
| C | -3.06756 | -0.55624 | 0.08480  |
| C | -3.97745 | 0.35695  | 0.65181  |
| C | -5.33637 | 0.08028  | 0.67132  |
| H | -6.88108 | -1.32926 | 0.15896  |
| H | -5.29924 | -2.96166 | -0.83810 |
| H | -2.88950 | -2.46419 | -0.91319 |
| H | -3.61482 | 1.27097  | 1.10948  |
| H | -6.02163 | 0.79188  | 1.11721  |
| H | 3.32222  | 2.46617  | -0.60320 |
| H | 1.21087  | 2.53006  | -1.57238 |
| C | 4.90717  | 0.68543  | 0.14325  |
| H | 5.22734  | 1.72171  | 0.15344  |
| C | 4.11674  | -1.97701 | 0.09476  |
| H | 3.80230  | -3.01505 | 0.08404  |
| C | 5.41202  | -1.66416 | 0.38172  |
| H | 6.13085  | -2.44796 | 0.58830  |
| C | 5.81323  | -0.30215 | 0.41890  |
| H | 6.83954  | -0.04681 | 0.65526  |

38

56-TS cyclohexane Energy: -955.677323

|   |          |          |          |
|---|----------|----------|----------|
| C | 2.75825  | 1.52925  | -0.57358 |
| C | 1.47648  | 1.59081  | -1.08662 |
| C | 3.54106  | 0.41683  | -0.18438 |
| C | 0.46522  | 0.60261  | -1.04464 |
| H | -0.16281 | 0.57961  | -1.93760 |
| C | 0.60506  | -0.75225 | -0.44354 |
| C | 3.12298  | -0.97557 | -0.17678 |
| C | 1.80986  | -1.45051 | -0.29024 |
| H | 1.68990  | -2.51681 | -0.10535 |
| C | -0.63829 | -1.27285 | -0.04768 |
| C | -1.02725 | 1.03053  | 0.09090  |
| C | -1.64036 | -0.31028 | 0.06527  |
| H | -0.78501 | -2.32163 | 0.18502  |
| C | -0.33345 | 1.39057  | 1.31076  |
| C | -1.73955 | 2.14251  | -0.49878 |
| N | -2.24809 | 3.02690  | -1.03055 |
| N | 0.23655  | 1.67867  | 2.26771  |
| C | -5.82285 | -1.09016 | 0.15006  |
| C | -4.94593 | -2.00967 | -0.42375 |
| C | -3.58623 | -1.74497 | -0.46389 |
| C | -3.06962 | -0.55463 | 0.08133  |
| C | -3.96574 | 0.35925  | 0.66412  |
| C | -5.32657 | 0.09397  | 0.69103  |
| H | -6.88668 | -1.29607 | 0.17599  |
| H | -5.32768 | -2.92892 | -0.85321 |
| H | -2.91329 | -2.44721 | -0.94396 |
| H | -3.59068 | 1.26722  | 1.12383  |
| H | -6.00237 | 0.80814  | 1.14707  |
| H | 3.30641  | 2.46705  | -0.59936 |
| H | 1.19725  | 2.51770  | -1.58122 |
| C | 4.89994  | 0.69335  | 0.14564  |
| H | 5.21328  | 1.73167  | 0.15960  |
| C | 4.12058  | -1.96984 | 0.09748  |
| H | 3.81083  | -3.00949 | 0.08891  |
| C | 5.41405  | -1.65194 | 0.38515  |
| H | 6.13540  | -2.43292 | 0.59420  |
| C | 5.80943  | -0.28847 | 0.42267  |
| H | 6.83375  | -0.02851 | 0.66275  |

38

56-TS ethanol Energy: -955.688206

|   |          |          |          |
|---|----------|----------|----------|
| C | 2.76705  | 1.53246  | -0.57091 |
| C | 1.48510  | 1.60077  | -1.07925 |
| C | 3.54694  | 0.41447  | -0.18255 |
| C | 0.47095  | 0.61395  | -1.04351 |
| H | -0.15598 | 0.59226  | -1.93681 |
| C | 0.60505  | -0.73920 | -0.43646 |
| C | 3.12288  | -0.97590 | -0.17672 |
| C | 1.80981  | -1.44645 | -0.29340 |
| H | 1.68551  | -2.51431 | -0.12347 |
| C | -0.63191 | -1.26011 | -0.03500 |
| C | -1.03992 | 1.04434  | 0.09537  |
| C | -1.64300 | -0.30092 | 0.07192  |
| H | -0.77269 | -2.30845 | 0.20243  |
| C | -0.34208 | 1.41036  | 1.30879  |
| C | -1.75656 | 2.15113  | -0.49506 |
| N | -2.27213 | 3.03257  | -1.02552 |
| N | 0.23771  | 1.70079  | 2.25977  |
| C | -5.81909 | -1.11389 | 0.13848  |
| C | -4.92937 | -2.03331 | -0.41767 |
| C | -3.57118 | -1.75903 | -0.44991 |
| C | -3.06765 | -0.55620 | 0.08463  |
| C | -3.97728 | 0.35707  | 0.65176  |
| C | -5.33623 | 0.08064  | 0.67141  |
| H | -6.88122 | -1.32860 | 0.15923  |
| H | -5.29982 | -2.96112 | -0.83826 |
| H | -2.88998 | -2.46389 | -0.91374 |
| H | -3.61440 | 1.27107  | 1.10929  |
| H | -6.02131 | 0.79239  | 1.11732  |
| H | 3.32187  | 2.46620  | -0.60288 |
| H | 1.21051  | 2.52983  | -1.57220 |
| C | 4.90715  | 0.68555  | 0.14308  |
| H | 5.22716  | 1.72188  | 0.15342  |
| C | 4.11687  | -1.97684 | 0.09478  |
| H | 3.80248  | -3.01491 | 0.08428  |
| C | 5.41219  | -1.66393 | 0.38146  |
| H | 6.13107  | -2.44769 | 0.58805  |
| C | 5.81330  | -0.30191 | 0.41856  |
| H | 6.83961  | -0.04650 | 0.65486  |

38

56-TS toluene Energy: -955.678671

|   |          |          |          |
|---|----------|----------|----------|
| C | 2.75965  | 1.52968  | -0.57305 |
| C | 1.47780  | 1.59224  | -1.08531 |
| C | 3.54207  | 0.41646  | -0.18418 |
| C | 0.46609  | 0.60429  | -1.04420 |
| H | -0.16163 | 0.58147  | -1.93734 |
| C | 0.60515  | -0.75038 | -0.44234 |
| C | 3.12306  | -0.97561 | -0.17658 |
| C | 1.80985  | -1.44982 | -0.29015 |
| H | 1.68921  | -2.51624 | -0.10669 |
| C | -0.63744 | -1.27105 | -0.04589 |
| C | -1.02893 | 1.03237  | 0.09145  |
| C | -1.64074 | -0.30899 | 0.06609  |
| H | -0.78336 | -2.31976 | 0.18750  |
| C | -0.33517 | 1.39343  | 1.31076  |
| C | -1.74171 | 2.14364  | -0.49856 |
| N | -2.25082 | 3.02770  | -1.03039 |
| N | 0.23517  | 1.68230  | 2.26735  |
| C | -5.82233 | -1.09360 | 0.14834  |
| C | -4.94362 | -2.01307 | -0.42304 |
| C | -3.58414 | -1.74696 | -0.46215 |
| C | -3.06940 | -0.55487 | 0.08159  |
| C | -3.96740 | 0.35890  | 0.66217  |
| C | -5.32796 | 0.09202  | 0.68812  |
| H | -6.88592 | -1.30077 | 0.17357  |
| H | -5.32378 | -2.93353 | -0.85129 |
| H | -2.91003 | -2.44950 | -0.94006 |
| H | -3.59407 | 1.26778  | 1.12150  |
| H | -6.00505 | 0.80591  | 1.14267  |
| H | 3.30869  | 2.46695  | -0.59959 |
| H | 1.19921  | 2.51950  | -1.57956 |
| C | 4.90121  | 0.69215  | 0.14496  |
| H | 5.21551  | 1.73017  | 0.15844  |
| C | 4.12009  | -1.97084 | 0.09731  |
| H | 3.80955  | -3.01024 | 0.08885  |
| C | 5.41390  | -1.65373 | 0.38449  |
| H | 6.13486  | -2.43512 | 0.59327  |
| C | 5.81020  | -0.29049 | 0.42167  |
| H | 6.83484  | -0.03124 | 0.66108  |

38

56-VHF vacuum      Energy: -955.722400

|   |          |          |          |
|---|----------|----------|----------|
| C | -3.53085 | -0.39860 | 1.80599  |
| C | -2.34341 | -0.62564 | 2.42996  |
| C | -3.86260 | -0.32048 | 0.39086  |
| C | -1.05636 | -0.84361 | 1.88494  |
| H | -0.25496 | -0.99531 | 2.59753  |
| C | -0.70874 | -0.84550 | 0.52623  |
| C | -2.94623 | -0.46829 | -0.68745 |
| C | -1.51821 | -0.71114 | -0.57410 |
| H | -1.01598 | -0.76721 | -1.53450 |
| C | 0.74923  | -0.99839 | 0.24308  |
| C | 1.40024  | 1.38897  | 0.27850  |
| C | 1.68126  | -0.00334 | 0.13205  |
| H | 1.11552  | -2.01264 | 0.11222  |
| C | 2.44753  | 2.34778  | 0.27208  |
| C | 0.11315  | 1.94451  | 0.47967  |
| N | -0.90680 | 2.45649  | 0.64817  |
| N | 3.28031  | 3.14659  | 0.27101  |
| C | 5.71045  | -1.20755 | -0.69296 |
| C | 5.04028  | -1.72032 | 0.41230  |
| C | 3.73637  | -1.32060 | 0.68248  |
| C | 3.09347  | -0.40217 | -0.14818 |
| C | 3.77321  | 0.11159  | -1.25371 |
| C | 5.07422  | -0.29218 | -1.52560 |
| H | 6.72763  | -1.51727 | -0.90343 |
| H | 5.53386  | -2.42676 | 1.06967  |
| H | 3.21756  | -1.70840 | 1.55308  |
| H | 3.28123  | 0.82417  | -1.90733 |
| H | 5.59159  | 0.11037  | -2.38861 |
| H | -2.38405 | -0.63383 | 3.51537  |
| C | -5.20957 | -0.08043 | 0.08886  |
| H | -5.90742 | 0.03600  | 0.91112  |
| C | -5.67586 | 0.01535  | -1.21484 |
| H | -6.72618 | 0.20328  | -1.40332 |
| C | -4.78217 | -0.12973 | -2.26817 |
| H | -5.12188 | -0.05780 | -3.29456 |
| C | -3.44238 | -0.36543 | -1.99580 |
| H | -2.74637 | -0.47374 | -2.82048 |
| H | -4.38331 | -0.25133 | 2.46181  |

38

56-VHF acetonitrile Energy: -955.722720

|   |          |          |          |
|---|----------|----------|----------|
| C | -3.32297 | 1.11889  | 1.42183  |
| C | -2.05378 | 1.31784  | 1.87193  |
| C | -3.86086 | 0.14057  | 0.48451  |
| C | -0.85170 | 0.66318  | 1.51540  |
| H | 0.04894  | 0.99825  | 2.01467  |
| C | -0.71078 | -0.39537 | 0.58844  |
| C | -3.11596 | -0.85955 | -0.19946 |
| C | -1.67950 | -1.06844 | -0.11303 |
| H | -1.32008 | -1.87553 | -0.74502 |
| C | 0.67167  | -0.83334 | 0.33453  |
| C | 1.51172  | 1.34074  | -0.45027 |
| C | 1.71280  | 0.00674  | -0.02177 |
| H | 0.89938  | -1.88834 | 0.44871  |
| C | 2.59371  | 2.26418  | -0.52377 |
| C | 0.27943  | 1.85569  | -0.93225 |
| N | -0.68333 | 2.30831  | -1.38051 |
| N | 3.44474  | 3.04065  | -0.56929 |
| C | 5.68269  | -1.58363 | 0.11852  |
| C | 4.82424  | -1.74771 | 1.20213  |
| C | 3.53647  | -1.22509 | 1.15540  |
| C | 3.10002  | -0.52694 | 0.02608  |
| C | 3.96679  | -0.36646 | -1.05923 |
| C | 5.25089  | -0.89560 | -1.01299 |
| H | 6.68577  | -1.99282 | 0.15416  |
| H | 5.15722  | -2.27929 | 2.08589  |
| H | 2.87054  | -1.34173 | 2.00397  |
| H | 3.62873  | 0.15343  | -1.94953 |
| H | 5.91250  | -0.77557 | -1.86288 |
| H | -1.93873 | 2.11380  | 2.60195  |
| C | -5.24399 | 0.20305  | 0.26275  |
| H | -5.81596 | 0.96343  | 0.78345  |
| C | -5.90087 | -0.67199 | -0.59374 |
| H | -6.97161 | -0.58714 | -0.73662 |
| C | -5.17342 | -1.65071 | -1.26050 |
| H | -5.66496 | -2.34333 | -1.93308 |
| C | -3.80193 | -1.73216 | -1.05955 |
| H | -3.23408 | -2.49289 | -1.58424 |
| H | -4.07562 | 1.78165  | 1.83735  |

38

56-VHF cyclohexane Energy: -955.719597

|   |          |          |          |
|---|----------|----------|----------|
| C | -3.49012 | 0.09494  | 1.84448  |
| C | -2.30532 | 0.01361  | 2.50443  |
| C | -3.83282 | -0.19647 | 0.45752  |
| C | -1.02292 | -0.36268 | 2.02910  |
| H | -0.21525 | -0.33253 | 2.75046  |
| C | -0.69336 | -0.73487 | 0.71841  |
| C | -2.93310 | -0.64975 | -0.54561 |
| C | -1.50822 | -0.88446 | -0.37825 |
| H | -1.01308 | -1.20223 | -1.29046 |
| C | 0.75548  | -0.95874 | 0.47156  |
| C | 1.35733  | 1.37691  | -0.05362 |
| C | 1.67424  | 0.00487  | 0.12833  |
| H | 1.13084  | -1.97264 | 0.57588  |
| C | 2.38422  | 2.33953  | -0.26581 |
| C | 0.05570  | 1.93871  | -0.01575 |
| N | -0.97018 | 2.46642  | -0.00205 |
| N | 3.19357  | 3.14361  | -0.43238 |
| C | 5.72779  | -1.27191 | -0.40530 |
| C | 5.06291  | -1.53825 | 0.78729  |
| C | 3.74964  | -1.11579 | 0.96157  |
| C | 3.09403  | -0.41817 | -0.05405 |
| C | 3.76714  | -0.15184 | -1.24782 |
| C | 5.07737  | -0.58010 | -1.42277 |
| H | 6.75150  | -1.60110 | -0.54125 |
| H | 5.56752  | -2.07016 | 1.58549  |
| H | 3.23412  | -1.31208 | 1.89602  |
| H | 3.26204  | 0.38184  | -2.04620 |
| H | 5.58976  | -0.37305 | -2.35498 |
| H | -2.33697 | 0.29208  | 3.55377  |
| C | -5.17698 | -0.00982 | 0.10751  |
| H | -5.86340 | 0.33905  | 0.87153  |
| C | -5.65418 | -0.25207 | -1.17329 |
| H | -6.70152 | -0.09320 | -1.40103 |
| C | -4.77554 | -0.69633 | -2.15377 |
| H | -5.12456 | -0.89131 | -3.16084 |
| C | -3.43921 | -0.88642 | -1.83331 |
| H | -2.75438 | -1.22885 | -2.60158 |
| H | -4.33478 | 0.42855  | 2.43917  |

38

56-VHF ethanol Energy: -955.723044

|   |          |          |          |
|---|----------|----------|----------|
| C | -3.32750 | 1.10407  | 1.43718  |
| C | -2.06130 | 1.30147  | 1.89524  |
| C | -3.85861 | 0.13419  | 0.48693  |
| C | -0.85599 | 0.65153  | 1.53908  |
| H | 0.04240  | 0.98685  | 2.04233  |
| C | -0.70941 | -0.40012 | 0.60651  |
| C | -3.10867 | -0.85885 | -0.20155 |
| C | -1.67269 | -1.06848 | -0.10659 |
| H | -1.30870 | -1.87067 | -0.74218 |
| C | 0.67626  | -0.83397 | 0.35649  |
| C | 1.50280  | 1.33616  | -0.45442 |
| C | 1.71090  | 0.00637  | -0.01532 |
| H | 0.91100  | -1.88544 | 0.48801  |
| C | 2.58281  | 2.25993  | -0.54896 |
| C | 0.26409  | 1.84726  | -0.92343 |
| N | -0.70467 | 2.29771  | -1.36082 |
| N | 3.43245  | 3.03670  | -0.61196 |
| C | 5.68778  | -1.56794 | 0.11377  |
| C | 4.83916  | -1.71961 | 1.20684  |
| C | 3.54917  | -1.20218 | 1.16366  |
| C | 3.10068  | -0.52171 | 0.02838  |
| C | 3.95758  | -0.37351 | -1.06631 |
| C | 5.24394  | -0.89747 | -1.02354 |
| H | 6.69262  | -1.97299 | 0.14668  |
| H | 5.18154  | -2.23738 | 2.09520  |
| H | 2.89089  | -1.30901 | 2.01946  |
| H | 3.61028  | 0.13309  | -1.96071 |
| H | 5.89795  | -0.78693 | -1.88056 |
| H | -1.95108 | 2.09205  | 2.63180  |
| C | -5.24018 | 0.19831  | 0.25637  |
| H | -5.81595 | 0.95347  | 0.78048  |
| C | -5.89081 | -0.66841 | -0.61315 |
| H | -6.96058 | -0.58257 | -0.76257 |
| C | -5.15834 | -1.64020 | -1.28448 |
| H | -5.64494 | -2.32635 | -1.96721 |
| C | -3.78830 | -1.72320 | -1.07480 |
| H | -3.21655 | -2.47862 | -1.60291 |
| H | -4.08355 | 1.76192  | 1.85431  |

38

56-VHF toluene Energy: -955.720904

|   |          |          |          |
|---|----------|----------|----------|
| C | -3.48055 | 0.25860  | 1.82852  |
| C | -2.29344 | 0.23035  | 2.48877  |
| C | -3.83031 | -0.15307 | 0.47426  |
| C | -1.01426 | -0.19023 | 2.04239  |
| H | -0.20305 | -0.10095 | 2.75493  |
| C | -0.69155 | -0.67577 | 0.76755  |
| C | -2.93649 | -0.69481 | -0.48945 |
| C | -1.51133 | -0.91654 | -0.30934 |
| H | -1.02050 | -1.31254 | -1.19294 |
| C | 0.75495  | -0.92342 | 0.53563  |
| C | 1.35596  | 1.36534  | -0.16576 |
| C | 1.67409  | 0.01233  | 0.12097  |
| H | 1.12832  | -1.92747 | 0.71488  |
| C | 2.38267  | 2.31098  | -0.44678 |
| C | 0.05363  | 1.92694  | -0.17813 |
| N | -0.97246 | 2.45370  | -0.21185 |
| N | 3.19168  | 3.10131  | -0.67057 |
| C | 5.72990  | -1.29921 | -0.29757 |
| C | 5.05889  | -1.47658 | 0.90824  |
| C | 3.74481  | -1.04267 | 1.04402  |
| C | 3.09451  | -0.42227 | -0.02392 |
| C | 3.77356  | -0.24507 | -1.23091 |
| C | 5.08469  | -0.68489 | -1.36689 |
| H | 6.75420  | -1.63742 | -0.40366 |
| H | 5.55915  | -1.94794 | 1.74623  |
| H | 3.22436  | -1.16938 | 1.98773  |
| H | 3.27251  | 0.22711  | -2.06953 |
| H | 5.60171  | -0.54797 | -2.30943 |
| H | -2.31957 | 0.59911  | 3.51000  |
| C | -5.17613 | 0.00520  | 0.11545  |
| H | -5.85832 | 0.42177  | 0.84872  |
| C | -5.65982 | -0.34802 | -1.13661 |
| H | -6.70797 | -0.20759 | -1.37257 |
| C | -4.78678 | -0.87930 | -2.07849 |
| H | -5.14120 | -1.16186 | -3.06264 |
| C | -3.44931 | -1.04324 | -1.74910 |
| H | -2.76884 | -1.45380 | -2.48725 |
| H | -4.32156 | 0.64592  | 2.39517  |

38

|               |                     |          |          |
|---------------|---------------------|----------|----------|
| 67-DHA vacuum | Energy: -955.636237 |          |          |
| C             | -3.61400            | 0.91680  | -0.01656 |
| C             | -2.83166            | 2.11249  | -0.00421 |
| C             | -1.46494            | 2.32696  | -0.02524 |
| C             | -0.44330            | 1.39207  | -0.17559 |
| C             | -0.60669            | -0.02368 | -0.61376 |
| C             | -1.80421            | -0.83547 | -0.37047 |
| C             | 0.94338             | 1.64229  | -0.01652 |
| C             | 1.70806             | 0.51050  | -0.06187 |
| C             | 0.75526             | -0.68773 | -0.14749 |
| C             | 1.16750             | -1.73058 | -1.09686 |
| N             | 1.44392             | -2.53171 | -1.87144 |
| H             | -3.42521            | 3.01553  | 0.10800  |
| H             | -1.14445            | 3.35475  | 0.12489  |
| H             | -0.49853            | 0.02372  | -1.72054 |
| H             | -1.64222            | -1.90354 | -0.50491 |
| H             | 1.34092             | 2.63341  | 0.17012  |
| C             | 3.15041             | 0.38141  | 0.01966  |
| C             | 3.76179             | -0.83249 | 0.37428  |
| C             | 3.97512             | 1.49010  | -0.24412 |
| C             | 5.14311             | -0.92824 | 0.46962  |
| H             | 3.16016             | -1.70638 | 0.59986  |
| C             | 5.35248             | 1.39016  | -0.14168 |
| H             | 3.52849             | 2.42762  | -0.55644 |
| C             | 5.94495             | 0.17973  | 0.21545  |
| H             | 5.59385             | -1.87359 | 0.74875  |
| H             | 5.97039             | 2.25533  | -0.35397 |
| H             | 7.02339             | 0.10123  | 0.28925  |
| C             | 0.57894             | -1.27938 | 1.19076  |
| N             | 0.43302             | -1.72187 | 2.24028  |
| C             | -3.11806            | -0.44324 | -0.13923 |
| C             | -4.08031            | -1.49847 | -0.04956 |
| C             | -5.42469            | -1.27156 | 0.12440  |
| C             | -5.90163            | 0.04584  | 0.21466  |
| C             | -5.00474            | 1.09582  | 0.14303  |
| H             | -3.71791            | -2.51791 | -0.12987 |
| H             | -6.11079            | -2.10824 | 0.18504  |
| H             | -5.37799            | 2.11172  | 0.22277  |
| H             | -6.95938            | 0.24142  | 0.34311  |

38

67-DHA acetonitrile Energy: -955.657096

|   |          |          |          |
|---|----------|----------|----------|
| C | -3.62243 | 0.91682  | -0.03270 |
| C | -2.83363 | 2.11751  | -0.03793 |
| C | -1.47236 | 2.32435  | -0.04190 |
| C | -0.44777 | 1.37848  | -0.16725 |
| C | -0.61868 | -0.04398 | -0.59993 |
| C | -1.81295 | -0.85105 | -0.28624 |
| C | 0.92804  | 1.63473  | -0.01479 |
| C | 1.70497  | 0.50342  | -0.07667 |
| C | 0.75610  | -0.69975 | -0.17018 |
| C | 1.16963  | -1.72060 | -1.14316 |
| N | 1.46488  | -2.49896 | -1.93355 |
| H | -3.42755 | 3.02332  | 0.04243  |
| H | -1.14659 | 3.35306  | 0.08691  |
| H | -0.56036 | -0.00695 | -1.70765 |
| H | -1.65169 | -1.92572 | -0.34836 |
| H | 1.31942  | 2.62761  | 0.17352  |
| C | 3.14236  | 0.38288  | 0.01594  |
| C | 3.76985  | -0.84362 | 0.30766  |
| C | 3.96005  | 1.51660  | -0.17244 |
| C | 5.15193  | -0.92837 | 0.41167  |
| H | 3.18244  | -1.73945 | 0.47824  |
| C | 5.33758  | 1.42526  | -0.06296 |
| H | 3.50830  | 2.46871  | -0.42658 |
| C | 5.94397  | 0.20222  | 0.22875  |
| H | 5.61118  | -1.88271 | 0.64248  |
| H | 5.94562  | 2.30959  | -0.21609 |
| H | 7.02242  | 0.13260  | 0.30912  |
| C | 0.62069  | -1.31374 | 1.16443  |
| N | 0.51107  | -1.75387 | 2.21945  |
| C | -3.12533 | -0.44829 | -0.09007 |
| C | -4.09230 | -1.50341 | 0.03377  |
| C | -5.43813 | -1.26653 | 0.16945  |
| C | -5.91282 | 0.05531  | 0.18922  |
| C | -5.01166 | 1.10398  | 0.09149  |
| H | -3.72987 | -2.52550 | 0.00404  |
| H | -6.12838 | -2.09760 | 0.25372  |
| H | -5.38685 | 2.12145  | 0.12319  |
| H | -6.97248 | 0.25818  | 0.28679  |

67-DHA cyclohexane Energy: -955.644051

|   |          |          |          |
|---|----------|----------|----------|
| C | -3.61700 | 0.91768  | -0.02218 |
| C | -2.83204 | 2.11482  | -0.01280 |
| C | -1.46701 | 2.32605  | -0.02586 |
| C | -0.44439 | 1.38737  | -0.16779 |
| C | -0.61028 | -0.03054 | -0.60566 |
| C | -1.80758 | -0.84096 | -0.33944 |
| C | 0.93856  | 1.63934  | -0.01152 |
| C | 1.70767  | 0.50783  | -0.06434 |
| C | 0.75584  | -0.69195 | -0.15154 |
| C | 1.16728  | -1.72862 | -1.10836 |
| N | 1.44792  | -2.52362 | -1.88762 |
| H | -3.42548 | 3.01905  | 0.08905  |
| H | -1.14473 | 3.35395  | 0.11876  |
| H | -0.51848 | 0.01439  | -1.71276 |
| H | -1.64632 | -1.91207 | -0.44788 |
| H | 1.33455  | 2.63064  | 0.17681  |
| C | 3.14842  | 0.38197  | 0.01789  |
| C | 3.76634  | -0.83616 | 0.35061  |
| C | 3.96997  | 1.49982  | -0.22311 |
| C | 5.14813  | -0.92775 | 0.44583  |
| H | 3.17032  | -1.71798 | 0.55977  |
| C | 5.34764  | 1.40328  | -0.12138 |
| H | 3.52071  | 2.44243  | -0.51534 |
| C | 5.94586  | 0.18851  | 0.21325  |
| H | 5.60246  | -1.87617 | 0.70828  |
| H | 5.96170  | 2.27536  | -0.31567 |
| H | 7.02452  | 0.11345  | 0.28691  |
| C | 0.59335  | -1.29186 | 1.18551  |
| N | 0.45864  | -1.73601 | 2.23583  |
| C | -3.12078 | -0.44451 | -0.12274 |
| C | -4.08532 | -1.49997 | -0.02467 |
| C | -5.43035 | -1.26912 | 0.13313  |
| C | -5.90634 | 0.05042  | 0.19957  |
| C | -5.00756 | 1.09989  | 0.12239  |
| H | -3.72279 | -2.52056 | -0.08725 |
| H | -6.11829 | -2.10380 | 0.19967  |
| H | -5.38155 | 2.11650  | 0.18604  |
| H | -6.96503 | 0.24883  | 0.31537  |

|                |                     |          |          |
|----------------|---------------------|----------|----------|
| 67-DHA ethanol | Energy: -955.656611 |          |          |
| C              | -3.62246            | 0.91689  | -0.03256 |
| C              | -2.83374            | 2.11741  | -0.03700 |
| C              | -1.47232            | 2.32436  | -0.04054 |
| C              | -0.44779            | 1.37873  | -0.16611 |
| C              | -0.61864            | -0.04363 | -0.59880 |
| C              | -1.81282            | -0.85084 | -0.28576 |
| C              | 0.92830             | 1.63484  | -0.01377 |
| C              | 1.70505             | 0.50364  | -0.07588 |
| C              | 0.75621             | -0.69951 | -0.16946 |
| C              | 1.16929             | -1.72008 | -1.14298 |
| N              | 1.46354             | -2.49842 | -1.93377 |
| H              | -3.42767            | 3.02321  | 0.04358  |
| H              | -1.14672            | 3.35306  | 0.08886  |
| H              | -0.56027            | -0.00615 | -1.70658 |
| H              | -1.65139            | -1.92548 | -0.34799 |
| H              | 1.31983             | 2.62765  | 0.17470  |
| C              | 3.14259             | 0.38301  | 0.01603  |
| C              | 3.76994             | -0.84342 | 0.30789  |
| C              | 3.96028             | 1.51647  | -0.17328 |
| C              | 5.15203             | -0.92836 | 0.41129  |
| H              | 3.18238             | -1.73904 | 0.47906  |
| C              | 5.33784             | 1.42500  | -0.06438 |
| H              | 3.50851             | 2.46849  | -0.42774 |
| C              | 5.94412             | 0.20201  | 0.22757  |
| H              | 5.61122             | -1.88269 | 0.64222  |
| H              | 5.94597             | 2.30915  | -0.21822 |
| H              | 7.02260             | 0.13226  | 0.30747  |
| C              | 0.62098             | -1.31424 | 1.16478  |
| N              | 0.51143             | -1.75574 | 2.21922  |
| C              | -3.12535            | -0.44818 | -0.09003 |
| C              | -4.09228            | -1.50324 | 0.03318  |
| C              | -5.43821            | -1.26647 | 0.16819  |
| C              | -5.91301            | 0.05532  | 0.18792  |
| C              | -5.01187            | 1.10397  | 0.09092  |
| H              | -3.72976            | -2.52530 | 0.00364  |
| H              | -6.12843            | -2.09761 | 0.25204  |
| H              | -5.38706            | 2.12143  | 0.12266  |
| H              | -6.97274            | 0.25810  | 0.28496  |

38

|                |                     |          |          |
|----------------|---------------------|----------|----------|
| 67-DHA toluene | Energy: -955.645607 |          |          |
| C              | -3.61747            | 0.91775  | -0.02321 |
| C              | -2.83205            | 2.11525  | -0.01494 |
| C              | -1.46741            | 2.32593  | -0.02702 |
| C              | -0.44458            | 1.38649  | -0.16736 |
| C              | -0.61094            | -0.03187 | -0.60497 |
| C              | -1.80819            | -0.84196 | -0.33441 |
| C              | 0.93760             | 1.63885  | -0.01156 |
| C              | 1.70753             | 0.50732  | -0.06539 |
| C              | 0.75586             | -0.69274 | -0.15270 |
| C              | 1.16728             | -1.72857 | -1.11049 |
| N              | 1.44900             | -2.52261 | -1.89031 |
| H              | -3.42549            | 3.01966  | 0.08499  |
| H              | -1.14475            | 3.35388  | 0.11623  |
| H              | -0.52198            | 0.01225  | -1.71209 |
| H              | -1.64710            | -1.91353 | -0.43843 |
| H              | 1.33322             | 2.63026  | 0.17682  |
| C              | 3.14793             | 0.38202  | 0.01751  |
| C              | 3.76695             | -0.83695 | 0.34613  |
| C              | 3.96903             | 1.50156  | -0.21868 |
| C              | 5.14880             | -0.92782 | 0.44178  |
| H              | 3.17190             | -1.72024 | 0.55187  |
| C              | 5.34673             | 1.40558  | -0.11662 |
| H              | 3.51945             | 2.44517  | -0.50704 |
| C              | 5.94590             | 0.18996  | 0.21371  |
| H              | 5.60371             | -1.87683 | 0.70108  |
| H              | 5.96013             | 2.27895  | -0.30715 |
| H              | 7.02456             | 0.11549  | 0.28767  |
| C              | 0.59575             | -1.29351 | 1.18437  |
| N              | 0.46313             | -1.73707 | 2.23522  |
| C              | -3.12120            | -0.44480 | -0.11984 |
| C              | -4.08610            | -1.50033 | -0.01978 |
| C              | -5.43119            | -1.26880 | 0.13566  |
| C              | -5.90697            | 0.05108  | 0.19789  |
| C              | -5.00789            | 1.10050  | 0.11920  |
| H              | -3.72359            | -2.52110 | -0.07930 |
| H              | -6.11943            | -2.10311 | 0.20359  |
| H              | -5.38200            | 2.11722  | 0.17999  |
| H              | -6.96577            | 0.24998  | 0.31182  |

38

67-TS vacuum Energy: -955.634082

|   |          |          |          |
|---|----------|----------|----------|
| C | -3.48646 | 0.89650  | 0.02402  |
| C | -2.73684 | 2.12756  | -0.01493 |
| C | -1.40159 | 2.37857  | -0.19281 |
| C | -0.37411 | 1.44031  | -0.41592 |
| C | -0.56566 | 0.08793  | -1.00256 |
| C | -1.78408 | -0.63884 | -1.06430 |
| C | 0.97803  | 1.63991  | -0.08200 |
| C | 1.69861  | 0.46405  | -0.01218 |
| C | 0.73614  | -0.68028 | -0.06224 |
| C | 1.16388  | -1.88846 | -0.75096 |
| N | 1.45215  | -2.82307 | -1.35463 |
| H | -3.33121 | 3.00234  | 0.23594  |
| H | -1.07655 | 3.40077  | -0.01395 |
| H | -0.03723 | 0.04239  | -1.96436 |
| H | -1.72716 | -1.55512 | -1.64727 |
| H | 1.39051  | 2.61531  | 0.14968  |
| C | 3.14060  | 0.31317  | 0.07494  |
| C | 3.72111  | -0.83505 | 0.63707  |
| C | 3.98615  | 1.33978  | -0.37929 |
| C | 5.09994  | -0.95103 | 0.73787  |
| H | 3.09048  | -1.63065 | 1.01942  |
| C | 5.36239  | 1.22330  | -0.26736 |
| H | 3.55443  | 2.21809  | -0.84703 |
| C | 5.92523  | 0.07605  | 0.28905  |
| H | 5.53153  | -1.84333 | 1.17623  |
| H | 6.00113  | 2.02142  | -0.62824 |
| H | 7.00213  | -0.01709 | 0.36961  |
| C | 0.11792  | -0.97877 | 1.22297  |
| N | -0.39315 | -1.20280 | 2.22781  |
| C | -3.03258 | -0.38269 | -0.44729 |
| C | -3.95411 | -1.46075 | -0.39941 |
| C | -5.22428 | -1.32855 | 0.11958  |
| C | -5.65632 | -0.08466 | 0.59384  |
| C | -4.79764 | 0.99758  | 0.52452  |
| H | -3.62735 | -2.42445 | -0.77543 |
| H | -5.88574 | -2.18660 | 0.15323  |
| H | -5.14146 | 1.96829  | 0.86721  |
| H | -6.65448 | 0.03602  | 0.99718  |

38

67-TS acetonitrile Energy: -955.652684

|   |          |          |          |
|---|----------|----------|----------|
| C | -3.48466 | 0.90044  | 0.03276  |
| C | -2.72860 | 2.13105  | -0.02351 |
| C | -1.39691 | 2.37274  | -0.22094 |
| C | -0.37488 | 1.42108  | -0.43584 |
| C | -0.57738 | 0.06914  | -1.02296 |
| C | -1.80275 | -0.64893 | -1.07225 |
| C | 0.97206  | 1.62597  | -0.10064 |
| C | 1.70030  | 0.45233  | -0.02342 |
| C | 0.74900  | -0.70230 | -0.07196 |
| C | 1.18691  | -1.90597 | -0.75653 |
| N | 1.48872  | -2.83912 | -1.35637 |
| H | -3.31592 | 3.01111  | 0.22401  |
| H | -1.06327 | 3.39544  | -0.06511 |
| H | -0.04726 | 0.01366  | -1.98145 |
| H | -1.75998 | -1.56742 | -1.65255 |
| H | 1.37903  | 2.60469  | 0.12489  |
| C | 3.14036  | 0.31401  | 0.07882  |
| C | 3.72905  | -0.83224 | 0.64149  |
| C | 3.97948  | 1.35295  | -0.36517 |
| C | 5.10883  | -0.93544 | 0.75117  |
| H | 3.10639  | -1.63467 | 1.02287  |
| C | 5.35644  | 1.24713  | -0.24637 |
| H | 3.54426  | 2.23242  | -0.82675 |
| C | 5.92734  | 0.10170  | 0.30887  |
| H | 5.54658  | -1.82313 | 1.19263  |
| H | 5.98940  | 2.05332  | -0.59869 |
| H | 7.00442  | 0.01887  | 0.39616  |
| C | 0.12361  | -1.00040 | 1.20631  |
| N | -0.40758 | -1.21357 | 2.20368  |
| C | -3.04371 | -0.38238 | -0.44443 |
| C | -3.97724 | -1.45394 | -0.39258 |
| C | -5.24124 | -1.31058 | 0.13866  |
| C | -5.65701 | -0.06361 | 0.62301  |
| C | -4.78918 | 1.01275  | 0.54746  |
| H | -3.66529 | -2.41852 | -0.77892 |
| H | -5.91198 | -2.16137 | 0.17286  |
| H | -5.12264 | 1.98616  | 0.89198  |
| H | -6.65051 | 0.06530  | 1.03504  |

38

67-TS cyclohexane Energy: -955.641048

|   |          |          |          |
|---|----------|----------|----------|
| C | -3.48746 | 0.89789  | 0.02684  |
| C | -2.73406 | 2.12743  | -0.01378 |
| C | -1.39947 | 2.37442  | -0.19726 |
| C | -0.37439 | 1.43170  | -0.41930 |
| C | -0.57046 | 0.07950  | -1.00631 |
| C | -1.79119 | -0.64367 | -1.06393 |
| C | 0.97623  | 1.63361  | -0.08652 |
| C | 1.70050  | 0.45888  | -0.01367 |
| C | 0.74287  | -0.68948 | -0.05890 |
| C | 1.17208  | -1.89756 | -0.74437 |
| N | 1.46219  | -2.83302 | -1.34612 |
| H | -3.32489 | 3.00414  | 0.23830  |
| H | -1.07080 | 3.39612  | -0.02318 |
| H | -0.03928 | 0.02836  | -1.96551 |
| H | -1.73927 | -1.56144 | -1.64488 |
| H | 1.38652  | 2.61050  | 0.14206  |
| C | 3.14217  | 0.31373  | 0.07527  |
| C | 3.72811  | -0.83234 | 0.63787  |
| C | 3.98355  | 1.34443  | -0.37976 |
| C | 5.10768  | -0.94303 | 0.73736  |
| H | 3.10207  | -1.62997 | 1.02363  |
| C | 5.36046  | 1.23257  | -0.26981 |
| H | 3.54875  | 2.22224  | -0.84539 |
| C | 5.92862  | 0.08712  | 0.28616  |
| H | 5.54321  | -1.83283 | 1.17682  |
| H | 5.99559  | 2.03320  | -0.63131 |
| H | 7.00591  | -0.00187 | 0.36545  |
| C | 0.12249  | -0.98487 | 1.22453  |
| N | -0.39374 | -1.20330 | 2.22818  |
| C | -3.03828 | -0.38257 | -0.44664 |
| C | -3.96588 | -1.45709 | -0.40269 |
| C | -5.23518 | -1.32002 | 0.11671  |
| C | -5.66131 | -0.07509 | 0.59532  |
| C | -4.79792 | 1.00394  | 0.52841  |
| H | -3.64418 | -2.42084 | -0.78284 |
| H | -5.90113 | -2.17469 | 0.14734  |
| H | -5.13774 | 1.97539  | 0.87266  |
| H | -6.65882 | 0.04900  | 0.99922  |

38

67-TS ethanol Energy: -955.652236

|   |          |          |          |
|---|----------|----------|----------|
| C | -3.48507 | 0.90031  | 0.03248  |
| C | -2.72892 | 2.13072  | -0.02262 |
| C | -1.39703 | 2.37255  | -0.21925 |
| C | -0.37492 | 1.42129  | -0.43465 |
| C | -0.57721 | 0.06932  | -1.02172 |
| C | -1.80235 | -0.64896 | -1.07133 |
| C | 0.97223  | 1.62616  | -0.09981 |
| C | 1.70043  | 0.45253  | -0.02277 |
| C | 0.74899  | -0.70194 | -0.07069 |
| C | 1.18642  | -1.90586 | -0.75519 |
| N | 1.48767  | -2.83916 | -1.35507 |
| H | -3.31628 | 3.01066  | 0.22529  |
| H | -1.06354 | 3.39514  | -0.06234 |
| H | -0.04688 | 0.01382  | -1.98014 |
| H | -1.75913 | -1.56751 | -1.65152 |
| H | 1.37932  | 2.60485  | 0.12566  |
| C | 3.14060  | 0.31408  | 0.07853  |
| C | 3.72947  | -0.83207 | 0.64108  |
| C | 3.97959  | 1.35272  | -0.36629 |
| C | 5.10929  | -0.93548 | 0.74983  |
| H | 3.10688  | -1.63431 | 1.02294  |
| C | 5.35660  | 1.24674  | -0.24836 |
| H | 3.54417  | 2.23207  | -0.82793 |
| C | 5.92767  | 0.10138  | 0.30677  |
| H | 5.54716  | -1.82320 | 1.19111  |
| H | 5.98947  | 2.05273  | -0.60136 |
| H | 7.00480  | 0.01836  | 0.39332  |
| C | 0.12410  | -0.99972 | 1.20796  |
| N | -0.40599 | -1.21300 | 2.20588  |
| C | -3.04376 | -0.38245 | -0.44446 |
| C | -3.97726 | -1.45399 | -0.39351 |
| C | -5.24169 | -1.31073 | 0.13663  |
| C | -5.65792 | -0.06381 | 0.62069  |
| C | -4.79007 | 1.01251  | 0.54604  |
| H | -3.66486 | -2.41854 | -0.77953 |
| H | -5.91239 | -2.16158 | 0.17029  |
| H | -5.12378 | 1.98585  | 0.89054  |
| H | -6.65176 | 0.06500  | 1.03195  |

38

67-TS toluene Energy: -955.642416

|   |          |          |          |
|---|----------|----------|----------|
| C | -3.48758 | 0.89819  | 0.02739  |
| C | -2.73357 | 2.12757  | -0.01409 |
| C | -1.39915 | 2.37381  | -0.19870 |
| C | -0.37450 | 1.43015  | -0.42027 |
| C | -0.57138 | 0.07797  | -1.00728 |
| C | -1.79258 | -0.64462 | -1.06395 |
| C | 0.97580  | 1.63250  | -0.08761 |
| C | 1.70072  | 0.45797  | -0.01428 |
| C | 0.74398  | -0.69120 | -0.05907 |
| C | 1.17379  | -1.89898 | -0.74423 |
| N | 1.46474  | -2.83436 | -1.34573 |
| H | -3.32381 | 3.00468  | 0.23783  |
| H | -1.06982 | 3.39549  | -0.02600 |
| H | -0.04002 | 0.02600  | -1.96621 |
| H | -1.74160 | -1.56267 | -1.64452 |
| H | 1.38570  | 2.60965  | 0.14042  |
| C | 3.14229  | 0.31385  | 0.07543  |
| C | 3.72906  | -0.83202 | 0.63792  |
| C | 3.98302  | 1.34549  | -0.37910 |
| C | 5.10873  | -0.94170 | 0.73767  |
| H | 3.10376  | -1.63020 | 1.02378  |
| C | 5.36003  | 1.23450  | -0.26903 |
| H | 3.54779  | 2.22337  | -0.84417 |
| C | 5.92899  | 0.08921  | 0.28670  |
| H | 5.54488  | -1.83115 | 1.17721  |
| H | 5.99459  | 2.03575  | -0.63010 |
| H | 7.00633  | 0.00103  | 0.36615  |
| C | 0.12336  | -0.98648 | 1.22401  |
| N | -0.39389 | -1.20412 | 2.22735  |
| C | -3.03929 | -0.38260 | -0.44634 |
| C | -3.96790 | -1.45655 | -0.40250 |
| C | -5.23693 | -1.31854 | 0.11729  |
| C | -5.66194 | -0.07333 | 0.59648  |
| C | -4.79775 | 1.00518  | 0.52948  |
| H | -3.64720 | -2.42039 | -0.78325 |
| H | -5.90365 | -2.17262 | 0.14773  |
| H | -5.13684 | 1.97684  | 0.87379  |
| H | -6.65924 | 0.05144  | 1.00065  |

38

|               |                     |          |          |
|---------------|---------------------|----------|----------|
| 67-VHF vacuum | Energy: -955.667949 |          |          |
| C             | -3.86462            | -1.02808 | -0.12847 |
| C             | -2.74318            | -1.94101 | -0.25567 |
| C             | -1.40194            | -1.74246 | -0.24069 |
| C             | -0.61177            | -0.55007 | -0.09874 |
| C             | -1.20940            | 0.74472  | 0.01906  |
| C             | -2.51238            | 1.12346  | 0.06238  |
| C             | 0.79965             | -0.76752 | -0.10053 |
| C             | 1.88946             | 0.05695  | -0.01470 |
| C             | 1.80133             | 1.52917  | 0.09684  |
| C             | 1.72205             | 2.14863  | 1.35772  |
| N             | 1.63890             | 2.63198  | 2.40467  |
| H             | -3.04613            | -2.97713 | -0.37822 |
| H             | -0.81810            | -2.65206 | -0.35296 |
| H             | -0.52814            | 1.57882  | 0.08466  |
| H             | -2.66415            | 2.19503  | 0.15378  |
| H             | 1.07175             | -1.81239 | -0.21964 |
| C             | 3.26283             | -0.50743 | -0.00927 |
| C             | 4.32774             | 0.16246  | -0.62464 |
| C             | 3.52395             | -1.73106 | 0.62187  |
| C             | 5.60245             | -0.39075 | -0.63677 |
| H             | 4.16488             | 1.11227  | -1.12070 |
| C             | 4.79804             | -2.28200 | 0.60639  |
| H             | 2.72961             | -2.23769 | 1.15846  |
| C             | 5.84355             | -1.61637 | -0.02648 |
| H             | 6.40913             | 0.14034  | -1.12910 |
| H             | 4.97828             | -3.22659 | 1.10723  |
| H             | 6.83936             | -2.04416 | -0.03329 |
| C             | 1.85769             | 2.35697  | -1.03923 |
| N             | 1.89544             | 3.01009  | -1.99289 |
| C             | -3.75748            | 0.37732  | 0.01921  |
| C             | -4.93702            | 1.13050  | 0.12822  |
| C             | -6.19084            | 0.54276  | 0.09793  |
| C             | -6.29578            | -0.83814 | -0.04735 |
| C             | -5.14525            | -1.60145 | -0.15882 |
| H             | -4.85506            | 2.20635  | 0.23973  |
| H             | -7.08005            | 1.15572  | 0.18566  |
| H             | -5.22775            | -2.67708 | -0.27341 |
| H             | -7.26827            | -1.31553 | -0.07426 |

38

67-VHF acetonitrile Energy: -955.669382

|   |          |          |          |
|---|----------|----------|----------|
| C | -3.74067 | 1.04576  | 0.03719  |
| C | -2.70708 | 2.05546  | -0.14514 |
| C | -1.38013 | 1.94598  | -0.37552 |
| C | -0.55705 | 0.77000  | -0.54810 |
| C | -1.13469 | -0.49986 | -0.92884 |
| C | -2.40348 | -0.94985 | -0.80574 |
| C | 0.82237  | 0.95735  | -0.39976 |
| C | 1.83824  | 0.02596  | -0.18276 |
| C | 1.53239  | -1.39611 | 0.01802  |
| C | 1.61488  | -2.32735 | -1.04124 |
| N | 1.69599  | -3.04776 | -1.93961 |
| H | -3.06780 | 3.07150  | -0.01378 |
| H | -0.83299 | 2.88513  | -0.38842 |
| H | -0.46830 | -1.18707 | -1.43281 |
| H | -2.56765 | -1.96007 | -1.17106 |
| H | 1.13550  | 1.99389  | -0.32477 |
| C | 3.24105  | 0.42813  | 0.00630  |
| C | 4.17143  | -0.43983 | 0.60609  |
| C | 3.70344  | 1.68468  | -0.43005 |
| C | 5.49301  | -0.05350 | 0.79661  |
| H | 3.87174  | -1.42687 | 0.93939  |
| C | 5.02343  | 2.06278  | -0.24068 |
| H | 3.03737  | 2.36403  | -0.94739 |
| C | 5.92696  | 1.20004  | 0.38000  |
| H | 6.18470  | -0.74068 | 1.27016  |
| H | 5.35334  | 3.03424  | -0.59091 |
| H | 6.95850  | 1.49923  | 0.52391  |
| C | 1.25737  | -1.87618 | 1.31779  |
| N | 1.00989  | -2.20564 | 2.39665  |
| C | -3.59918 | -0.33274 | -0.25248 |
| C | -4.69954 | -1.18317 | -0.04975 |
| C | -5.90371 | -0.71497 | 0.44825  |
| C | -6.04399 | 0.64274  | 0.73399  |
| C | -4.97913 | 1.50225  | 0.51890  |
| H | -4.59274 | -2.23551 | -0.29040 |
| H | -6.73008 | -1.39811 | 0.60418  |
| H | -5.09606 | 2.55996  | 0.72907  |
| H | -6.98225 | 1.02865  | 1.11498  |

38

67-VHF cyclohexane Energy: -955.664263

|   |          |          |          |
|---|----------|----------|----------|
| C | -3.86604 | 1.02223  | 0.12583  |
| C | -2.75041 | 1.94365  | 0.26762  |
| C | -1.40999 | 1.75654  | 0.26694  |
| C | -0.60699 | 0.56542  | 0.13091  |
| C | -1.20068 | -0.73769 | 0.02418  |
| C | -2.49868 | -1.12316 | -0.02842 |
| C | 0.79163  | 0.79016  | 0.12993  |
| C | 1.88930  | -0.04085 | 0.03417  |
| C | 1.78260  | -1.50389 | -0.08720 |
| C | 1.68748  | -2.10819 | -1.35820 |
| N | 1.59389  | -2.56873 | -2.41342 |
| H | -3.06255 | 2.97749  | 0.38627  |
| H | -0.83269 | 2.66964  | 0.38402  |
| H | -0.51477 | -1.57050 | -0.01875 |
| H | -2.64431 | -2.19677 | -0.10614 |
| H | 1.06184  | 1.83492  | 0.25060  |
| C | 3.26442  | 0.50748  | 0.01438  |
| C | 4.34604  | -0.22610 | 0.52383  |
| C | 3.52338  | 1.77474  | -0.53116 |
| C | 5.63127  | 0.30247  | 0.51860  |
| H | 4.18987  | -1.20943 | 0.95207  |
| C | 4.80788  | 2.29940  | -0.53321 |
| H | 2.71983  | 2.33975  | -0.98916 |
| C | 5.86915  | 1.56844  | -0.00469 |
| H | 6.44836  | -0.28018 | 0.92844  |
| H | 4.98399  | 3.27749  | -0.96655 |
| H | 6.87245  | 1.97817  | -0.01175 |
| C | 1.84225  | -2.34466 | 1.04365  |
| N | 1.88369  | -3.00045 | 1.99396  |
| C | -3.74971 | -0.38198 | -0.01210 |
| C | -4.92228 | -1.14333 | -0.13719 |
| C | -6.17987 | -0.56193 | -0.13241 |
| C | -6.29429 | 0.81925  | 0.00402  |
| C | -5.14963 | 1.58967  | 0.13196  |
| H | -4.83252 | -2.21935 | -0.24087 |
| H | -7.06416 | -1.18004 | -0.23254 |
| H | -5.24001 | 2.66528  | 0.24019  |
| H | -7.26950 | 1.29171  | 0.01168  |

38

|                |                     |          |          |
|----------------|---------------------|----------|----------|
| 67-VHF ethanol | Energy: -955.669294 |          |          |
| C              | -3.74470            | 1.04565  | 0.04061  |
| C              | -2.70768            | 2.05320  | -0.13328 |
| C              | -1.38028            | 1.94172  | -0.36052 |
| C              | -0.55853            | 0.76559  | -0.53700 |
| C              | -1.13730            | -0.50345 | -0.91775 |
| C              | -2.40732            | -0.95128 | -0.79929 |
| C              | 0.82165             | 0.95285  | -0.39170 |
| C              | 1.83990             | 0.02341  | -0.17950 |
| C              | 1.53934             | -1.39999 | 0.02017  |
| C              | 1.61681             | -2.32843 | -1.04187 |
| N              | 1.69280             | -3.04697 | -1.94221 |
| H              | -3.06625            | 3.06957  | 0.00146  |
| H              | -0.83158            | 2.88002  | -0.36778 |
| H              | -0.47030            | -1.19299 | -1.41758 |
| H              | -2.57132            | -1.96160 | -1.16440 |
| H              | 1.13410             | 1.98954  | -0.31566 |
| C              | 3.24249             | 0.42952  | 0.00474  |
| C              | 4.17629             | -0.43306 | 0.60675  |
| C              | 3.70070             | 1.68487  | -0.43899 |
| C              | 5.49726             | -0.04246 | 0.79230  |
| H              | 3.87972             | -1.41896 | 0.94603  |
| C              | 5.02017             | 2.06736  | -0.25445 |
| H              | 3.03167             | 2.35953  | -0.95870 |
| C              | 5.92718             | 1.21006  | 0.36846  |
| H              | 6.19173             | -0.72552 | 1.26778  |
| H              | 5.34684             | 3.03781  | -0.61048 |
| H              | 6.95831             | 1.51247  | 0.50854  |
| C              | 1.27439             | -1.88461 | 1.32026  |
| N              | 1.03567             | -2.21920 | 2.39953  |
| C              | -3.60481            | -0.33241 | -0.25181 |
| C              | -4.70817            | -1.18065 | -0.05709 |
| C              | -5.91409            | -0.71083 | 0.43523  |
| C              | -6.05278            | 0.64640  | 0.72365  |
| C              | -4.98461            | 1.50382  | 0.51681  |
| H              | -4.60250            | -2.23271 | -0.29944 |
| H              | -6.74287            | -1.39245 | 0.58489  |
| H              | -5.10006            | 2.56123  | 0.72932  |
| H              | -6.99220            | 1.03357  | 1.10047  |

38

|                |                     |          |          |
|----------------|---------------------|----------|----------|
| 67-VHF toluene | Energy: -955.666369 |          |          |
| C              | -3.86652            | 1.02076  | 0.12229  |
| C              | -2.75258            | 1.94399  | 0.26720  |
| C              | -1.41212            | 1.75961  | 0.27054  |
| C              | -0.60609            | 0.56904  | 0.13728  |
| C              | -1.19864            | -0.73581 | 0.03582  |
| C              | -2.49575            | -1.12304 | -0.01893 |
| C              | 0.79035             | 0.79682  | 0.13348  |
| C              | 1.88977             | -0.03492 | 0.03538  |
| C              | 1.77638             | -1.49725 | -0.07886 |
| C              | 1.67591             | -2.10689 | -1.34717 |
| N              | 1.57847             | -2.57022 | -2.40073 |
| H              | -3.06684            | 2.97744  | 0.38375  |
| H              | -0.83667            | 2.67380  | 0.38783  |
| H              | -0.51175            | -1.56828 | 0.00017  |
| H              | -2.63967            | -2.19729 | -0.09138 |
| H              | 1.05774             | 1.84231  | 0.25178  |
| C              | 3.26547             | 0.50816  | 0.01037  |
| C              | 4.35317             | -0.25104 | 0.46880  |
| C              | 3.52381             | 1.79472  | -0.49057 |
| C              | 5.64151             | 0.26999  | 0.46026  |
| H              | 4.20131             | -1.25104 | 0.85815  |
| C              | 4.81130             | 2.31106  | -0.49664 |
| H              | 2.71775             | 2.38397  | -0.91160 |
| C              | 5.87798             | 1.55428  | -0.01666 |
| H              | 6.46214             | -0.33358 | 0.83082  |
| H              | 4.98539             | 3.30428  | -0.89495 |
| H              | 6.88347             | 1.95853  | -0.02626 |
| C              | 1.83718             | -2.33091 | 1.05769  |
| N              | 1.88004             | -2.97881 | 2.01319  |
| C              | -3.74786            | -0.38345 | -0.01136 |
| C              | -4.91876            | -1.14699 | -0.14006 |
| C              | -6.17699            | -0.56704 | -0.14319 |
| C              | -6.29377            | 0.81451  | -0.01088 |
| C              | -5.15085            | 1.58683  | 0.12087  |
| H              | -4.82711            | -2.22319 | -0.24017 |
| H              | -7.06006            | -1.18642 | -0.24611 |
| H              | -5.24312            | 2.66256  | 0.22603  |
| H              | -7.26964            | 1.28564  | -0.00924 |

38

|               |          |             |          |
|---------------|----------|-------------|----------|
| 78-DHA vacuum | Energy:  | -955.674682 |          |
| C             | -4.28063 | 1.21006     | -0.36276 |
| C             | -3.35651 | 0.15034     | -0.13455 |
| C             | -1.97373 | 0.49096     | 0.01168  |
| C             | -1.54909 | 1.77239     | -0.31618 |
| C             | -2.46918 | 2.76223     | -0.64815 |
| C             | -3.84460 | 2.48682     | -0.62226 |
| H             | -5.34023 | 0.97675     | -0.39000 |
| H             | -0.49633 | 2.02546     | -0.31027 |
| H             | -2.11687 | 3.75625     | -0.89746 |
| H             | -4.56007 | 3.27460     | -0.82808 |
| C             | -3.84400 | -1.17880    | -0.18176 |
| H             | -4.92514 | -1.27019    | -0.11456 |
| C             | -1.09913 | -0.61535    | 0.54831  |
| H             | -1.64180 | -1.07471    | 1.38044  |
| C             | -0.82704 | -1.65110    | -0.51914 |
| C             | -3.18124 | -2.36452    | -0.57163 |
| C             | -1.84187 | -2.55316    | -0.88722 |
| H             | -3.84187 | -3.20299    | -0.77142 |
| H             | -1.56608 | -3.44239    | -1.44552 |
| C             | 0.47812  | -1.50583    | -0.98033 |
| C             | 0.36163  | -0.26231    | 1.01230  |
| C             | 1.20385  | -0.57300    | -0.22476 |
| H             | 0.89403  | -2.06606    | -1.80805 |
| C             | 0.51806  | 1.07348     | 1.61013  |
| C             | 0.73269  | -1.24046    | 2.06407  |
| N             | 1.04825  | -2.01248    | 2.85427  |
| N             | 0.65877  | 2.09605     | 2.11229  |
| C             | 5.19355  | 0.70127     | -0.92150 |
| C             | 4.43369  | 0.14758     | -1.95320 |
| C             | 3.13520  | -0.26440    | -1.72056 |
| C             | 2.54810  | -0.13097    | -0.43870 |
| C             | 3.33628  | 0.42479     | 0.59449  |
| C             | 4.63631  | 0.83235     | 0.34985  |
| H             | 6.21165  | 1.02395     | -1.10672 |
| H             | 4.85935  | 0.04488     | -2.94524 |
| H             | 2.54573  | -0.66663    | -2.53706 |
| H             | 2.94153  | 0.51262     | 1.59971  |
| H             | 5.22433  | 1.24925     | 1.15949  |

38

78-DHA acetonitrile Energy: -955.689528

|   |          |          |          |
|---|----------|----------|----------|
| C | 3.66108  | 1.85940  | -0.00150 |
| C | 2.75198  | 2.93263  | -0.03351 |
| C | 3.48034  | 0.45902  | 0.00853  |
| C | 1.37217  | 2.90362  | -0.01439 |
| H | 0.85690  | 3.85484  | 0.08270  |
| C | 0.54550  | 1.76634  | -0.08272 |
| C | 2.25869  | -0.27642 | -0.17614 |
| C | 0.93709  | 0.37453  | -0.52131 |
| H | 0.92482  | 0.42667  | -1.62447 |
| C | -0.84467 | 1.82517  | 0.06298  |
| C | -0.36438 | -0.46070 | -0.15628 |
| C | -1.46751 | 0.59726  | -0.04350 |
| H | -1.36708 | 2.75283  | 0.26372  |
| C | -0.66197 | -1.45827 | -1.19605 |
| C | -0.22890 | -1.11104 | 1.16266  |
| N | -0.16279 | -1.57184 | 2.21258  |
| N | -0.88057 | -2.20492 | -2.04052 |
| C | -5.63133 | -0.23952 | 0.17725  |
| C | -5.17776 | 1.06423  | -0.03143 |
| C | -3.82322 | 1.32956  | -0.11247 |
| C | -2.86937 | 0.29336  | 0.01827  |
| C | -3.34754 | -1.01864 | 0.22766  |
| C | -4.70713 | -1.27452 | 0.30494  |
| H | -6.69368 | -0.44527 | 0.23723  |
| H | -5.88928 | 1.87494  | -0.14085 |
| H | -3.49061 | 2.34343  | -0.30342 |
| H | -2.65656 | -1.84402 | 0.35610  |
| H | -5.04855 | -2.28955 | 0.47257  |
| H | 4.70023  | 2.16732  | 0.06695  |
| H | 3.20790  | 3.91701  | -0.00477 |
| C | 4.68190  | -0.29923 | 0.19866  |
| H | 5.60510  | 0.25198  | 0.34152  |
| C | 2.32551  | -1.67140 | -0.18725 |
| H | 1.43452  | -2.26096 | -0.36340 |
| C | 3.50553  | -2.37046 | 0.01734  |
| H | 3.49268  | -3.45380 | 0.01972  |
| C | 4.70287  | -1.66798 | 0.21492  |
| H | 5.63390  | -2.19966 | 0.37207  |

38

78-DHA cyclohexane Energy: -955.689551

|   |          |          |          |
|---|----------|----------|----------|
| C | 3.66108  | 1.85940  | -0.00150 |
| C | 2.75198  | 2.93263  | -0.03351 |
| C | 3.48034  | 0.45902  | 0.00853  |
| C | 1.37217  | 2.90362  | -0.01439 |
| H | 0.85690  | 3.85484  | 0.08270  |
| C | 0.54550  | 1.76634  | -0.08272 |
| C | 2.25869  | -0.27642 | -0.17614 |
| C | 0.93709  | 0.37453  | -0.52131 |
| H | 0.92482  | 0.42667  | -1.62447 |
| C | -0.84467 | 1.82517  | 0.06298  |
| C | -0.36438 | -0.46070 | -0.15628 |
| C | -1.46751 | 0.59726  | -0.04350 |
| H | -1.36708 | 2.75283  | 0.26372  |
| C | -0.66197 | -1.45827 | -1.19605 |
| C | -0.22890 | -1.11104 | 1.16266  |
| N | -0.16279 | -1.57184 | 2.21258  |
| N | -0.88057 | -2.20492 | -2.04052 |
| C | -5.63133 | -0.23952 | 0.17725  |
| C | -5.17776 | 1.06423  | -0.03143 |
| C | -3.82322 | 1.32956  | -0.11247 |
| C | -2.86937 | 0.29336  | 0.01827  |
| C | -3.34754 | -1.01864 | 0.22766  |
| C | -4.70713 | -1.27452 | 0.30494  |
| H | -6.69368 | -0.44527 | 0.23723  |
| H | -5.88928 | 1.87494  | -0.14085 |
| H | -3.49061 | 2.34343  | -0.30342 |
| H | -2.65656 | -1.84402 | 0.35610  |
| H | -5.04855 | -2.28955 | 0.47257  |
| H | 4.70023  | 2.16732  | 0.06695  |
| H | 3.20790  | 3.91701  | -0.00477 |
| C | 4.68190  | -0.29923 | 0.19866  |
| H | 5.60510  | 0.25198  | 0.34152  |
| C | 2.32551  | -1.67140 | -0.18725 |
| H | 1.43452  | -2.26096 | -0.36340 |
| C | 3.50553  | -2.37046 | 0.01734  |
| H | 3.49268  | -3.45380 | 0.01972  |
| C | 4.70287  | -1.66798 | 0.21492  |
| H | 5.63390  | -2.19966 | 0.37207  |

38

|                |          |                     |          |
|----------------|----------|---------------------|----------|
| 78-DHA ethanol |          | Energy: -955.703066 |          |
| C              | 3.66148  | 1.85814             | -0.01679 |
| C              | 2.75032  | 2.93204             | -0.04565 |
| C              | 3.48003  | 0.45680             | 0.00464  |
| C              | 1.37413  | 2.90321             | -0.02053 |
| H              | 0.85782  | 3.85387             | 0.07407  |
| C              | 0.54377  | 1.76243             | -0.08743 |
| C              | 2.25871  | -0.27944            | -0.16976 |
| C              | 0.93812  | 0.37096             | -0.53212 |
| H              | 0.93202  | 0.42358             | -1.63385 |
| C              | -0.83919 | 1.82622             | 0.05622  |
| C              | -0.36368 | -0.46305            | -0.16978 |
| C              | -1.46870 | 0.59437             | -0.05860 |
| H              | -1.35895 | 2.75495             | 0.25745  |
| C              | -0.65558 | -1.46359            | -1.20771 |
| C              | -0.23743 | -1.10606            | 1.15446  |
| N              | -0.18381 | -1.54776            | 2.21340  |
| N              | -0.87518 | -2.20963            | -2.05233 |
| C              | -5.63105 | -0.23848            | 0.18635  |
| C              | -5.17459 | 1.07003             | 0.00673  |
| C              | -3.82064 | 1.33547             | -0.08017 |
| C              | -2.86475 | 0.29235             | 0.01253  |
| C              | -3.34790 | -1.02556            | 0.19531  |
| C              | -4.70729 | -1.27931            | 0.28026  |
| H              | -6.69323 | -0.44301            | 0.25155  |
| H              | -5.88465 | 1.88530             | -0.07356 |
| H              | -3.48926 | 2.35430             | -0.24370 |
| H              | -2.66050 | -1.85768            | 0.29681  |
| H              | -5.05007 | -2.29711            | 0.42756  |
| H              | 4.70078  | 2.16713             | 0.04398  |
| H              | 3.20671  | 3.91613             | -0.02075 |
| C              | 4.68195  | -0.29785            | 0.20135  |
| H              | 5.60581  | 0.25452             | 0.33422  |
| C              | 2.32505  | -1.67294            | -0.15962 |
| H              | 1.43563  | -2.26708            | -0.32925 |
| C              | 3.50728  | -2.37215            | 0.05183  |
| H              | 3.49387  | -3.45537            | 0.06513  |
| C              | 4.70357  | -1.66864            | 0.23619  |
| H              | 5.63557  | -2.19744            | 0.39668  |

38

78-DHA toluene Energy: -955.691280

|   |          |          |          |
|---|----------|----------|----------|
| C | 3.66112  | 1.85950  | -0.00537 |
| C | 2.75154  | 2.93263  | -0.03558 |
| C | 3.48052  | 0.45897  | 0.00694  |
| C | 1.37219  | 2.90338  | -0.01405 |
| H | 0.85676  | 3.85441  | 0.08367  |
| C | 0.54518  | 1.76565  | -0.08214 |
| C | 2.25880  | -0.27681 | -0.17459 |
| C | 0.93718  | 0.37394  | -0.52186 |
| H | 0.92565  | 0.42637  | -1.62480 |
| C | -0.84409 | 1.82496  | 0.06316  |
| C | -0.36428 | -0.46122 | -0.15740 |
| C | -1.46775 | 0.59661  | -0.04508 |
| H | -1.36627 | 2.75263  | 0.26427  |
| C | -0.66056 | -1.45926 | -1.19703 |
| C | -0.23061 | -1.11075 | 1.16226  |
| N | -0.16687 | -1.56947 | 2.21324  |
| N | -0.87869 | -2.20598 | -2.04155 |
| C | -5.63155 | -0.23896 | 0.17706  |
| C | -5.17729 | 1.06554  | -0.02650 |
| C | -3.82276 | 1.33061  | -0.10778 |
| C | -2.86890 | 0.29311  | 0.01725  |
| C | -3.34804 | -1.01976 | 0.22182  |
| C | -4.70766 | -1.27511 | 0.29951  |
| H | -6.69395 | -0.44435 | 0.23732  |
| H | -5.88843 | 1.87716  | -0.13147 |
| H | -3.49002 | 2.34527  | -0.29412 |
| H | -2.65776 | -1.84634 | 0.34619  |
| H | -5.04953 | -2.29060 | 0.46344  |
| H | 4.70033  | 2.16773  | 0.06055  |
| H | 3.20736  | 3.91706  | -0.00766 |
| C | 4.68243  | -0.29853 | 0.19708  |
| H | 5.60581  | 0.25306  | 0.33720  |
| C | 2.32564  | -1.67155 | -0.18167 |
| H | 1.43474  | -2.26196 | -0.35543 |
| C | 3.50625  | -2.37039 | 0.02318  |
| H | 3.49337  | -3.45372 | 0.02807  |
| C | 4.70362  | -1.66755 | 0.21696  |
| H | 5.63497  | -2.19866 | 0.37402  |

38

|              |                     |          |          |
|--------------|---------------------|----------|----------|
| 78-TS vacuum | Energy: -955.673140 |          |          |
| C            | 3.49365             | 1.74690  | 0.31726  |
| C            | 2.65920             | 2.83922  | 0.03840  |
| C            | 1.31065             | 2.84991  | -0.27637 |
| C            | 0.46485             | 1.73185  | -0.38147 |
| C            | 0.91217             | 0.36640  | -0.77351 |
| H            | 4.45912             | 2.01324  | 0.73844  |
| H            | 3.11048             | 3.81415  | 0.19420  |
| H            | 0.82007             | 3.82053  | -0.29408 |
| C            | -0.91616            | 1.77927  | -0.14159 |
| C            | -1.49622            | 0.53303  | 0.08326  |
| C            | -0.44679            | -0.46180 | 0.35591  |
| C            | -0.65716            | -1.82316 | -0.07863 |
| C            | 0.22883             | -0.37289 | 1.63529  |
| N            | -0.77868            | -2.89276 | -0.48538 |
| N            | 0.78773             | -0.29789 | 2.63815  |
| H            | 0.40407             | 0.04688  | -1.68581 |
| H            | -1.46500            | 2.71284  | -0.08764 |
| C            | -2.91257            | 0.22170  | 0.00610  |
| C            | -3.46594            | -0.86058 | 0.71134  |
| C            | -3.77104            | 1.03198  | -0.75838 |
| C            | -4.82573            | -1.12417 | 0.64643  |
| H            | -2.83070            | -1.48176 | 1.33342  |
| C            | -5.13096            | 0.77024  | -0.81115 |
| H            | -3.35579            | 1.85229  | -1.33401 |
| C            | -5.66414            | -0.31085 | -0.11200 |
| H            | -5.23538            | -1.96198 | 1.19878  |
| H            | -5.77734            | 1.40128  | -1.41062 |
| H            | -6.72703            | -0.51825 | -0.15862 |
| C            | 2.36730             | -1.52470 | -1.16309 |
| C            | 3.47463             | -2.28422 | -0.89938 |
| H            | 3.54528             | -3.29277 | -1.28908 |
| C            | 4.52011             | -1.75522 | -0.09946 |
| H            | 5.38580             | -2.36463 | 0.13202  |
| C            | 4.44702             | -0.46880 | 0.34745  |
| H            | 5.26814             | -0.04526 | 0.91619  |
| H            | 1.55678             | -1.94600 | -1.74861 |
| C            | 3.32764             | 0.37705  | 0.05958  |
| C            | 2.21036             | -0.21380 | -0.63499 |

38

78-TS acetonitrile Energy: -955.692038

|   |          |          |          |
|---|----------|----------|----------|
| C | 3.48466  | 1.76803  | 0.33462  |
| C | 2.64343  | 2.85587  | 0.04066  |
| C | 1.30036  | 2.85303  | -0.28102 |
| C | 0.46148  | 1.72006  | -0.36863 |
| C | 0.92389  | 0.36675  | -0.78244 |
| H | 4.44371  | 2.04311  | 0.76423  |
| H | 3.08922  | 3.83462  | 0.18544  |
| H | 0.80237  | 3.81840  | -0.32629 |
| C | -0.91053 | 1.76515  | -0.11451 |
| C | -1.50155 | 0.51515  | 0.08913  |
| C | -0.46262 | -0.49669 | 0.34183  |
| C | -0.67656 | -1.84638 | -0.11697 |
| C | 0.22313  | -0.43755 | 1.61334  |
| N | -0.80093 | -2.91127 | -0.53648 |
| N | 0.79837  | -0.38512 | 2.60936  |
| H | 0.42061  | 0.04954  | -1.69758 |
| H | -1.45385 | 2.70056  | -0.04319 |
| C | -2.91758 | 0.22120  | 0.01520  |
| C | -3.47826 | -0.88301 | 0.68531  |
| C | -3.77524 | 1.06812  | -0.71459 |
| C | -4.84090 | -1.13312 | 0.61817  |
| H | -2.84836 | -1.52808 | 1.28823  |
| C | -5.13732 | 0.81731  | -0.77019 |
| H | -3.35995 | 1.90914  | -1.25884 |
| C | -5.67658 | -0.28605 | -0.10848 |
| H | -5.25606 | -1.98418 | 1.14557  |
| H | -5.78149 | 1.47592  | -1.34134 |
| H | -6.74132 | -0.48267 | -0.15679 |
| C | 2.40017  | -1.50926 | -1.16493 |
| C | 3.51414  | -2.26043 | -0.89534 |
| H | 3.60357  | -3.26336 | -1.29553 |
| C | 4.54636  | -1.72491 | -0.08206 |
| H | 5.41768  | -2.32543 | 0.15118  |
| C | 4.45735  | -0.43984 | 0.36961  |
| H | 5.27213  | -0.00937 | 0.94215  |
| H | 1.60326  | -1.92991 | -1.76953 |
| C | 3.33078  | 0.39720  | 0.07386  |
| C | 2.22576  | -0.20289 | -0.63223 |

38

78-TS cyclohexane Energy: -955.680241

|   |          |          |          |
|---|----------|----------|----------|
| C | 3.49151  | 1.75433  | 0.32270  |
| C | 2.65391  | 2.84463  | 0.03945  |
| C | 1.30716  | 2.85002  | -0.27731 |
| C | 0.46416  | 1.72655  | -0.37685 |
| C | 0.91756  | 0.36536  | -0.77605 |
| H | 4.45453  | 2.02436  | 0.74690  |
| H | 3.10244  | 3.82112  | 0.19236  |
| H | 0.81360  | 3.81872  | -0.30358 |
| C | -0.91375 | 1.77349  | -0.13281 |
| C | -1.49853 | 0.52603  | 0.08460  |
| C | -0.45352 | -0.47470 | 0.35262  |
| C | -0.66478 | -1.83235 | -0.08935 |
| C | 0.22367  | -0.39411 | 1.63024  |
| N | -0.78764 | -2.90037 | -0.50033 |
| N | 0.78408  | -0.32458 | 2.63297  |
| H | 0.41085  | 0.04543  | -1.68869 |
| H | -1.46016 | 2.70803  | -0.07240 |
| C | -2.91478 | 0.22145  | 0.00797  |
| C | -3.47146 | -0.86776 | 0.70180  |
| C | -3.77249 | 1.04427  | -0.74573 |
| C | -4.83227 | -1.12634 | 0.63567  |
| H | -2.83875 | -1.49680 | 1.31856  |
| C | -5.13321 | 0.78671  | -0.79990 |
| H | -3.35691 | 1.87150  | -1.31093 |
| C | -5.66915 | -0.30160 | -0.11300 |
| H | -5.24411 | -1.96832 | 1.17994  |
| H | -5.77845 | 1.42712  | -1.39051 |
| H | -6.73274 | -0.50496 | -0.16062 |
| C | 2.38061  | -1.52001 | -1.16291 |
| C | 3.49121  | -2.27574 | -0.89840 |
| H | 3.56830  | -3.28256 | -1.29131 |
| C | 4.53268  | -1.74360 | -0.09535 |
| H | 5.40080  | -2.34947 | 0.13612  |
| C | 4.45349  | -0.45767 | 0.35326  |
| H | 5.27240  | -0.03123 | 0.92293  |
| H | 1.57458  | -1.94191 | -1.75421 |
| C | 3.33051  | 0.38401  | 0.06398  |
| C | 2.21724  | -0.21071 | -0.63345 |

38

78-TS ethanol Energy: -955.691589

|   |          |          |          |
|---|----------|----------|----------|
| C | 3.48481  | 1.76709  | 0.33408  |
| C | 2.64382  | 2.85509  | 0.04056  |
| C | 1.30066  | 2.85274  | -0.28120 |
| C | 0.46153  | 1.72026  | -0.36948 |
| C | 0.92353  | 0.36648  | -0.78232 |
| H | 4.44396  | 2.04192  | 0.76366  |
| H | 3.08972  | 3.83371  | 0.18593  |
| H | 0.80297  | 3.81832  | -0.32566 |
| C | -0.91076 | 1.76554  | -0.11593 |
| C | -1.50149 | 0.51568  | 0.08880  |
| C | -0.46220 | -0.49540 | 0.34285  |
| C | -0.67570 | -1.84577 | -0.11433 |
| C | 0.22329  | -0.43410 | 1.61453  |
| N | -0.79979 | -2.91107 | -0.53286 |
| N | 0.79795  | -0.37964 | 2.61075  |
| H | 0.41989  | 0.04879  | -1.69710 |
| H | -1.45419 | 2.70095  | -0.04536 |
| C | -2.91748 | 0.22113  | 0.01476  |
| C | -3.47793 | -0.88241 | 0.68602  |
| C | -3.77521 | 1.06681  | -0.71628 |
| C | -4.84045 | -1.13308 | 0.61882  |
| H | -2.84789 | -1.52666 | 1.28967  |
| C | -5.13720 | 0.81552  | -0.77192 |
| H | -3.36000 | 1.90724  | -1.26153 |
| C | -5.67623 | -0.28720 | -0.10901 |
| H | -5.25540 | -1.98375 | 1.14704  |
| H | -5.78146 | 1.47320  | -1.34405 |
| H | -6.74089 | -0.48427 | -0.15738 |
| C | 2.39918  | -1.50996 | -1.16509 |
| C | 3.51302  | -2.26133 | -0.89579 |
| H | 3.60189  | -3.26444 | -1.29567 |
| C | 4.54568  | -1.72600 | -0.08299 |
| H | 5.41687  | -2.32677 | 0.15011  |
| C | 4.45709  | -0.44092 | 0.36866  |
| H | 5.27205  | -0.01067 | 0.94111  |
| H | 1.60184  | -1.93065 | -1.76909 |
| C | 3.33066  | 0.39630  | 0.07327  |
| C | 2.22529  | -0.20347 | -0.63250 |

38

78-TS toluene Energy: -955.681625

|   |          |          |          |
|---|----------|----------|----------|
| C | 3.49086  | 1.75562  | 0.32394  |
| C | 2.65281  | 2.84562  | 0.03959  |
| C | 1.30648  | 2.85011  | -0.27780 |
| C | 0.46393  | 1.72563  | -0.37620 |
| C | 0.91842  | 0.36521  | -0.77670 |
| H | 4.45337  | 2.02627  | 0.74886  |
| H | 3.10093  | 3.82237  | 0.19186  |
| H | 0.81245  | 3.81847  | -0.30603 |
| C | -0.91337 | 1.77249  | -0.13131 |
| C | -1.49896 | 0.52481  | 0.08487  |
| C | -0.45468 | -0.47700 | 0.35195  |
| C | -0.66603 | -1.83399 | -0.09128 |
| C | 0.22311  | -0.39783 | 1.62905  |
| N | -0.78901 | -2.90179 | -0.50290 |
| N | 0.78444  | -0.32915 | 2.63138  |
| H | 0.41195  | 0.04521  | -1.68941 |
| H | -1.45935 | 2.70720  | -0.06984 |
| C | -2.91517 | 0.22139  | 0.00847  |
| C | -3.47235 | -0.86922 | 0.70008  |
| C | -3.77283 | 1.04657  | -0.74306 |
| C | -4.83335 | -1.12696 | 0.63375  |
| H | -2.84004 | -1.49975 | 1.31572  |
| C | -5.13368 | 0.78968  | -0.79748 |
| H | -3.35730 | 1.87519  | -1.30623 |
| C | -5.67004 | -0.30009 | -0.11298 |
| H | -5.24555 | -1.96978 | 1.17646  |
| H | -5.77876 | 1.43185  | -1.38631 |
| H | -6.73374 | -0.50277 | -0.16075 |
| C | 2.38295  | -1.51908 | -1.16312 |
| C | 3.49409  | -2.27417 | -0.89831 |
| H | 3.57251  | -3.28059 | -1.29199 |
| C | 4.53467  | -1.74156 | -0.09438 |
| H | 5.40322  | -2.34679 | 0.13714  |
| C | 4.45431  | -0.45576 | 0.35466  |
| H | 5.27277  | -0.02883 | 0.92460  |
| H | 1.57787  | -1.94095 | -1.75573 |
| C | 3.33076  | 0.38524  | 0.06494  |
| C | 2.21834  | -0.21011 | -0.63329 |

38

78-VHF vacuum      Energy: -955.723043

|   |          |          |          |
|---|----------|----------|----------|
| C | -5.21033 | 0.01455  | 0.10495  |
| C | -3.86460 | 0.05646  | 0.49256  |
| C | -2.94397 | -0.79701 | -0.17671 |
| C | -3.43446 | -1.63459 | -1.18944 |
| C | -4.77359 | -1.65982 | -1.55222 |
| C | -5.67152 | -0.82572 | -0.89902 |
| H | -5.91144 | 0.66860  | 0.61221  |
| H | -2.73502 | -2.28345 | -1.70529 |
| H | -5.10907 | -2.32382 | -2.34002 |
| H | -6.72120 | -0.82523 | -1.16773 |
| C | -3.53824 | 0.98598  | 1.56432  |
| H | -4.39229 | 1.54974  | 1.92649  |
| C | -1.51460 | -0.88278 | 0.07414  |
| H | -1.00625 | -1.57884 | -0.58542 |
| C | -0.71316 | -0.22363 | 0.97185  |
| C | -2.35538 | 1.25263  | 2.18185  |
| C | -1.06856 | 0.71262  | 1.95460  |
| H | -2.40193 | 1.99937  | 2.96923  |
| H | -0.27274 | 1.08933  | 2.58511  |
| C | 0.74575  | -0.53089 | 0.88959  |
| C | 1.41052  | 1.19649  | -0.75237 |
| C | 1.68456  | 0.10012  | 0.12117  |
| H | 1.10771  | -1.34035 | 1.51712  |
| C | 2.41043  | 1.69647  | -1.62771 |
| C | 0.16569  | 1.86289  | -0.85887 |
| N | -0.81897 | 2.45068  | -0.98472 |
| N | 3.20542  | 2.11929  | -2.34938 |
| C | 5.70578  | -1.35870 | 0.37543  |
| C | 4.66815  | -2.22405 | 0.04653  |
| C | 3.36575  | -1.74593 | -0.04367 |
| C | 3.09097  | -0.39814 | 0.19052  |
| C | 4.13776  | 0.46579  | 0.51650  |
| C | 5.43793  | -0.01388 | 0.61142  |
| H | 6.72173  | -1.73014 | 0.44428  |
| H | 4.87207  | -3.27081 | -0.14716 |
| H | 2.55721  | -2.41694 | -0.31472 |
| H | 3.93416  | 1.51492  | 0.70341  |
| H | 6.24270  | 0.66480  | 0.86875  |

38

78-VHF acetonitrile Energy: -955.723074

|   |          |          |          |
|---|----------|----------|----------|
| C | 5.07924  | -0.00587 | 0.07425  |
| C | 3.77419  | -0.50754 | -0.01971 |
| C | 2.75367  | 0.11352  | 0.75248  |
| C | 3.10880  | 1.19950  | 1.57011  |
| C | 4.41061  | 1.67583  | 1.64828  |
| C | 5.40642  | 1.06887  | 0.89236  |
| H | 5.85703  | -0.47736 | -0.51680 |
| H | 2.33324  | 1.67822  | 2.15821  |
| H | 4.64175  | 2.51457  | 2.29417  |
| H | 6.42847  | 1.42563  | 0.93630  |
| C | 3.59412  | -1.64372 | -0.91883 |
| H | 4.51118  | -1.95647 | -1.40905 |
| C | 1.34650  | -0.23967 | 0.75713  |
| H | 0.73686  | 0.40014  | 1.38708  |
| C | 0.66314  | -1.23431 | 0.08193  |
| C | 2.49230  | -2.37398 | -1.22488 |
| C | 1.15151  | -2.22958 | -0.76686 |
| H | 2.64880  | -3.18745 | -1.92678 |
| H | 0.43177  | -2.94170 | -1.15405 |
| C | -0.80588 | -1.22475 | 0.22246  |
| C | -1.20225 | 0.93225  | -0.90704 |
| C | -1.63643 | -0.18408 | -0.15515 |
| H | -1.27765 | -2.10357 | 0.65124  |
| C | -2.03089 | 2.07981  | -1.06696 |
| C | 0.02737  | 1.01385  | -1.60898 |
| N | 0.99519  | 1.12339  | -2.22892 |
| N | -2.66753 | 3.03225  | -1.19604 |
| C | -5.75398 | -0.46286 | 0.97950  |
| C | -4.75287 | -0.62524 | 1.93315  |
| C | -3.41584 | -0.52908 | 1.56242  |
| C | -3.07140 | -0.26000 | 0.23554  |
| C | -4.08071 | -0.09840 | -0.71771 |
| C | -5.41591 | -0.20324 | -0.34648 |
| H | -6.79589 | -0.54066 | 1.26806  |
| H | -5.01150 | -0.82435 | 2.96657  |
| H | -2.63455 | -0.64622 | 2.30617  |
| H | -3.82128 | 0.08892  | -1.75448 |
| H | -6.19200 | -0.08711 | -1.09392 |

38

78-VHF cyclohexane Energy: -955.719306

|   |          |          |          |
|---|----------|----------|----------|
| C | -5.16999 | 0.04021  | 0.07499  |
| C | -3.83010 | 0.07084  | 0.48468  |
| C | -2.91310 | -0.81318 | -0.14662 |
| C | -3.39886 | -1.67020 | -1.14626 |
| C | -4.73179 | -1.68411 | -1.53116 |
| C | -5.62736 | -0.81867 | -0.91502 |
| H | -5.86933 | 0.71780  | 0.55296  |
| H | -2.70070 | -2.34289 | -1.63264 |
| H | -5.06473 | -2.36319 | -2.30708 |
| H | -6.67218 | -0.80863 | -1.20182 |
| C | -3.50914 | 1.02389  | 1.54045  |
| H | -4.36253 | 1.60674  | 1.87270  |
| C | -1.48785 | -0.90944 | 0.12605  |
| H | -0.97443 | -1.62298 | -0.51092 |
| C | -0.69503 | -0.23570 | 1.02412  |
| C | -2.33686 | 1.28951  | 2.17407  |
| C | -1.04959 | 0.72808  | 1.97833  |
| H | -2.38648 | 2.05498  | 2.94296  |
| H | -0.25694 | 1.11039  | 2.61017  |
| C | 0.75878  | -0.53716 | 0.95056  |
| C | 1.35128  | 1.13982  | -0.76093 |
| C | 1.67395  | 0.08847  | 0.13770  |
| H | 1.14160  | -1.31641 | 1.60324  |
| C | 2.31749  | 1.63133  | -1.68336 |
| C | 0.09044  | 1.78001  | -0.86586 |
| N | -0.90251 | 2.35206  | -0.99989 |
| N | 3.07692  | 2.04475  | -2.44605 |
| C | 5.72992  | -1.26992 | 0.35993  |
| C | 4.70523  | -2.17111 | 0.08918  |
| C | 3.39018  | -1.72647 | 0.01027  |
| C | 3.09129  | -0.37575 | 0.19532  |
| C | 4.12397  | 0.52424  | 0.46489  |
| C | 5.43691  | 0.07732  | 0.54963  |
| H | 6.75522  | -1.61608 | 0.42129  |
| H | 4.92881  | -3.22015 | -0.06636 |
| H | 2.59138  | -2.42627 | -0.21275 |
| H | 3.89967  | 1.57452  | 0.61961  |
| H | 6.23119  | 0.78259  | 0.76436  |

38

|                |                     |          |          |
|----------------|---------------------|----------|----------|
| 78-VHF Ethanol | Energy: -955.722967 |          |          |
| C              | 5.08164             | -0.00383 | 0.05735  |
| C              | 3.77459             | -0.50182 | -0.02969 |
| C              | 2.76443             | 0.10888  | 0.76369  |
| C              | 3.13073             | 1.18103  | 1.59427  |
| C              | 4.43417             | 1.65376  | 1.66535  |
| C              | 5.42010             | 1.05707  | 0.88852  |
| H              | 5.85170             | -0.46707 | -0.55010 |
| H              | 2.36268             | 1.65188  | 2.19835  |
| H              | 4.67422             | 2.48185  | 2.32164  |
| H              | 6.44324             | 1.41145  | 0.92627  |
| C              | 3.58227             | -1.62354 | -0.94438 |
| H              | 4.49305             | -1.92993 | -1.45006 |
| C              | 1.35605             | -0.24176 | 0.77829  |
| H              | 0.75433             | 0.39162  | 1.42229  |
| C              | 0.66436             | -1.22521 | 0.09721  |
| C              | 2.47588             | -2.34791 | -1.24807 |
| C              | 1.14081             | -2.20832 | -0.77281 |
| H              | 2.62296             | -3.15106 | -1.96379 |
| H              | 0.41536             | -2.91339 | -1.16218 |
| C              | -0.80429            | -1.21286 | 0.25329  |
| C              | -1.20774            | 0.91935  | -0.91964 |
| C              | -1.63814            | -0.18404 | -0.14630 |
| H              | -1.27152            | -2.07891 | 0.71212  |
| C              | -2.04501            | 2.05629  | -1.10871 |
| C              | 0.02747             | 1.00064  | -1.61140 |
| N              | 1.00002             | 1.11170  | -2.22361 |
| N              | -2.68885            | 3.00016  | -1.26228 |
| C              | -5.75561            | -0.45061 | 0.99224  |
| C              | -4.75484            | -0.58182 | 1.95101  |
| C              | -3.41784            | -0.48993 | 1.57909  |
| C              | -3.07324            | -0.25630 | 0.24569  |
| C              | -4.08207            | -0.12590 | -0.71266 |
| C              | -5.41723            | -0.22636 | -0.34002 |
| H              | -6.79749            | -0.52480 | 1.28186  |
| H              | -5.01380            | -0.75312 | 2.98933  |
| H              | -2.63686            | -0.58283 | 2.32660  |
| H              | -3.82214            | 0.03445  | -1.75383 |
| H              | -6.19299            | -0.13401 | -1.09111 |

38

78-VHF toluene Energy: -955.720879

|   |          |          |          |
|---|----------|----------|----------|
| C | -5.15947 | -0.04315 | -0.06645 |
| C | -3.82181 | -0.07037 | -0.48458 |
| C | -2.90299 | 0.81540  | 0.14156  |
| C | -3.38438 | 1.67104  | 1.14496  |
| C | -4.71474 | 1.68141  | 1.53812  |
| C | -5.61230 | 0.81397  | 0.92696  |
| H | -5.86032 | -0.72192 | -0.54049 |
| H | -2.68466 | 2.34504  | 1.62725  |
| H | -5.04455 | 2.35919  | 2.31651  |
| H | -6.65523 | 0.80137  | 1.22045  |
| C | -3.50568 | -1.02193 | -1.54301 |
| H | -4.36054 | -1.60466 | -1.87172 |
| C | -1.47961 | 0.91349  | -0.13821 |
| H | -0.96308 | 1.62703  | 0.49632  |
| C | -0.69037 | 0.23930  | -1.03986 |
| C | -2.33666 | -1.28659 | -2.18293 |
| C | -1.04837 | -0.72517 | -1.99172 |
| H | -2.38961 | -2.05123 | -2.95236 |
| H | -0.25772 | -1.10784 | -2.62599 |
| C | 0.76359  | 0.53625  | -0.96841 |
| C | 1.33506  | -1.12560 | 0.76403  |
| C | 1.67059  | -0.08633 | -0.14297 |
| H | 1.15272  | 1.30551  | -1.62908 |
| C | 2.28966  | -1.60770 | 1.70396  |
| C | 0.07241  | -1.76345 | 0.86243  |
| N | -0.92224 | -2.33394 | 0.99192  |
| N | 3.03832  | -2.01245 | 2.48169  |
| C | 5.73637  | 1.24284  | -0.35655 |
| C | 4.71583  | 2.15446  | -0.10519 |
| C | 3.39729  | 1.71965  | -0.02888 |
| C | 3.09093  | 0.36826  | -0.19668 |
| C | 4.11940  | -0.54231 | -0.44679 |
| C | 5.43582  | -0.10513 | -0.52926 |
| H | 6.76425  | 1.58154  | -0.41628 |
| H | 4.94530  | 3.20415  | 0.03677  |
| H | 2.60164  | 2.42779  | 0.17848  |
| H | 3.88904  | -1.59308 | -0.58895 |
| H | 6.22684  | -0.81834 | -0.72934 |
